# Supplementary material
Source: PubMed Central journal article supplement (PMC4197572)
Supplement: supp_141.19.3662_DEV113936.pdf [file supp_141.19.3662_DEV113936.pdf]

# DMRT6 Integrative Analysis

Source code for this analysis is available at the UMN github repository: <https://github.umn.edu/gearh006/umn-gcd-bioinformatics-dmrt6>

Process raw data using STAR, FASTQC, PICARD, SAMTOOLS and IGVTOOLS (Minnesota Supercomputing Institute)

```
dd=/home/zarkowe0/data_release/umgc/hiseq/131125_SN261_0527_AC3540ACXX/Project_Zarkower_Project_013
wd=/home/bardwell/gearhart/dmrt6/
org=mm9
```

```
for i in 1663_1_DM6_WT_ATCACG 1663_3_DM6_WT_TTAGGC \
1663_5_DM6_Null_ACAGTG 1663_2_DM6_Null_CGATGT 1663_4_DM6_WT_TGACCA 1665_2_DM6_Null_GCCAAT
```

```
#i="{file%.*}"
```

```
do
```

```
sf1="{i}_L005_R1_001.fastq"
```

```
sf2="{i}_L005_R2_001.fastq"
```

```
cat << EOF > $i.star.pbs
```

```
#PBS -l mem=32000mb,nodes=1:ppn=4,walltime=10:00:00
```

```
#PBS -m a
```

```
#PBS -M gearh006@umn.edu
```

```
#PBS -q lab
```

```
mkdir $wd/$i
```

```
cd $wd/$i
```

```
/home/bardwell/shared/STAR_2.3.0e/STAR --genomeDir /home/bardwell/shared/STAR_GENOME/$org/ \
```

```
--runThreadN 8 --readFilesIn $dd/$sf1 $dd/$sf2
```

```
qsub $wd/$i.igv.pbs
```

```
EOF
```

```
cat << EOF > $i.igv.pbs
```

```
#PBS -l mem=8000mb,nodes=1:ppn=1,walltime=08:00:00
```

```
#PBS -m a
```

```
#PBS -M gearh006@umn.edu
```

```
#PBS -q lab
```

```
module load samtools
```

```
cd $wd
```

```
/home/bardwell/shared/FastQC/fastqc -o fastqc $dd/$sf1
```

```
/home/bardwell/shared/FastQC/fastqc -o fastqc $dd/$sf2
```

```
cd $wd/$i
```

```
#convert sam to bam
```

```
samtools view -bS -o $i.raw.bam Aligned.out.sam
```

```
#sort the bam file
```

```
samtools sort $i.raw.bam $i.sort
```

```
#remove duplicates
```

```
java -Xmx2g -jar /home/bardwell/shared/picard-tools-1.94/MarkDuplicates.jar INPUT=$i.sort.bam OUTPUT=$i.bam RE
```

```
#create the index file
```

```
samtools index $i.bam
```

```
#igvtools to make a TDF File
```

```
java -Xmx2g -jar /home/bardwell/shared/IGVTools_2/igvtools.jar count -z 5 -w 25 -e 100 $i.bam $i.tdf \  
/home/bardwell/shared/IGVTools_2/genomes/$org.genome
```

```
rm $i.sort.bam  
rm $i.raw.bam
```

```
mv $i.bam $wd/  
mv $i.bam.bai $wd/  
mv $i.tdf $wd/  
EOF
```

```
qsub $i.star.pbs
```

```
done
```

Analyse Reads for differential expression with EdgeR (RNA-SEQ mm9 version)

```
library(Rsamtools)
```

```
## Loading required package: IRanges  
## Loading required package: BiocGenerics  
## Loading required package: parallel  
##  
## Attaching package: 'BiocGenerics'  
##  
## The following objects are masked from 'package:parallel':  
##  
##   clusterApply, clusterApplyLB, clusterCall,  
##   clusterEvalQ, clusterExport, clusterMap,  
##   parApply, parCapply, parLapply, parLapplyLB,  
##   parRapply, parSapply, parSapplyLB  
##  
## The following object is masked from 'package:stats':  
##  
##   xtabs  
##  
## The following objects are masked from 'package:base':  
##  
##   Filter, Find, Map, Position, Reduce,  
##   anyDuplicated, append, as.data.frame, as.vector,  
##   cbind, colnames, do.call, duplicated, eval,  
##   evalq, get, intersect, is.unsorted, lapply,  
##   mapply, match, mget, order, paste, pmax,  
##   pmax.int, pmin, pmin.int, rank, rbind, rep.int,  
##   rownames, sapply, setdiff, sort, table, tapply,  
##   union, unique, unlist  
##  
## Loading required package: GenomicRanges  
## Loading required package: GenomeInfoDb  
## Loading required package: XVector  
## Loading required package: Biostrings
```

```
library(GenomicFeatures)
```

```
## Loading required package: AnnotationDbi  
## Loading required package: Biobase  
## Welcome to Bioconductor  
##
```

```

##      Vignettes contain introductory material; view
##      with 'browseVignettes()'. To cite Bioconductor,
##      see 'citation("Biobase")', and for packages
##      'citation("pkgname")'.

library(GenomicRanges)
library(GenomicAlignments)

## Loading required package: BSgenome
##
## Attaching package: 'BSgenome'
##
## The following object is masked from 'package:AnnotationDbi':
##
##      species
##
## Attaching package: 'GenomicAlignments'
##
## The following object is masked _by_ '.GlobalEnv':
##
##      last

library(edgeR)

## Loading required package: limma
##
## Attaching package: 'limma'
##
## The following object is masked from 'package:BiocGenerics':
##
##      plotMA

library(qvalue)

# For transcriptDB and annotations
library(biomaRt)

# For Pubmed Lookups
library(XML)

# For microarray
library(GEOquery)

## Setting options('download.file.method.GEOquery'='curl')

library(Biobase)

# For Chip Analysis
library(rtracklayer)
library(ChIPpeakAnno)

## Loading required package: grid
## Loading required package: VennDiagram
## Loading required package: DBI

data(TSS.mouse.NCBIM37)
library(org.Mm.eg.db)

```

```

##

library(GOstats)

## Loading required package: Category
## Loading required package: Matrix
##
## Attaching package: 'Matrix'
##
## The following object is masked from 'package:IRanges':
##
##   expand
##
## Loading required package: GO.db
## Loading required package: graph
##
## Attaching package: 'graph'
##
## The following object is masked from 'package:XML':
##
##   addNode
##
## The following object is masked from 'package:Biostrings':
##
##   complement
##
## Attaching package: 'GOstats'
##
## The following object is masked from 'package:AnnotationDbi':
##
##   makeGOGraph

```

```
library("GO.db")
```

```
# For Motif Analysis
```

```
library(BSgenome.Mmusculus.UCSC.mm9)
library(rGADEM)
```

```
## Loading required package: seqLogo
```

```
library(motifStack)
```

```
## Loading required package: grImport
## Loading required package: MotIV
##
## Attaching package: 'MotIV'
##
## The following object is masked from 'package:rGADEM':
##
##   readPWMfile
##
## The following object is masked from 'package:seqLogo':
##
##   makePWM
##
## The following object is masked from 'package:stats':
##

```

```

##      filter
##
## Loading required package: ade4
##
## Attaching package: 'ade4'
##
## The following object is masked from 'package:rtracklayer':
##
##      score
##
## The following object is masked from 'package:BSgenome':
##
##      score
##
## The following object is masked from 'package:Biostrings':
##
##      score
##
## The following object is masked from 'package:GenomicRanges':
##
##      score
##
## The following object is masked from 'package:IRanges':
##
##      score

```

This section uses a package called biomaRt to download data from Ensembl. We will get a list of all the Ensembl genes in the genome and some annotation information for these genes. Since our data is mapped to mm9 we will use the May 2012 archive of Ensembl (their current release is based on mm10). Ensembl chromosomes are numbered 1-19,X,Y whereas our bam files are references as chr1-chr19,chrX,chrY so we have to do a quick switch of the chromosome names to use Ensembl genes on USCS mapped data.

```

# use may2012 archive to get mm9 NCBI37 build (Ensembl
# Release 67)
ensembl = useMart(host = "may2012.archive.ensembl.org", biomart = "ENSEMBL_MART_ENSEMBL",
  dataset = "mmusculus_gene_ensembl")
# ensembl=useMart(biomart='ensembl', dataset='mmusculus_gene_ensembl')
mme <- makeTranscriptDbFromBiomart(host = "may2012.archive.ensembl.org",
  biomart = "ENSEMBL_MART_ENSEMBL", dataset = "mmusculus_gene_ensembl")
exonsByGene <- exonsBy(mme, by = "gene")
chroms <- seqlevels(mme)
chroms[1:21]

# oldSeqLevelsToKeep
oldSeqLevelsToKeep <- as.character(chroms[1:21])
str(oldSeqLevelsToKeep)
oldSeqLevelsToKeep

# Create a named character vector to use hg19 chromosome
# names
chromRename <- paste("chr", as.character(chroms[1:21]), sep = "")
names(chromRename) <- as.character(chroms[1:21])
str(chromRename)
chromRename

exonsByGene[1000:1000]
exonsByGene <- keepSeqlevels(exonsByGene, oldSeqLevelsToKeep)
exonsByGene[1000:1000]
exonsByGene <- renameSeqlevels(exonsByGene, chromRename)
exonsByGene[1000:1000]

```

```
save(exonsByGene, file = "exonsByGene_mm9_biomart_ensembl.rdata")
```

This chunk counts all the reads in the data. Can take a long time so better to do it on the server.

```
#PBS -l mem=32gb,nodes=1:ppn=1,walltime=2:00:00
#PBS -m a
#PBS -M gearh006@umn.edu
#PBS -q lab
```

```
cd /home/bardwell/gearhart/dmrt6/
```

```
cat << EOF > summarizeOverlaps.r
```

```
library(Rsamtools)
load("exonsByGene_mm9_biomart_ensembl.rdata")

fls <- list.files("/home/bardwell/gearhart/dmrt6", pattern="bam$",full=TRUE)
bamlst <- BamFileList(fls)
genehits <- summarizeOverlaps(exonsByGene, bamlst, mode="Union",
                             singleEnd=TRUE, ignore.strand=TRUE)
save(genehits,file= "120313_DMRT6_counts_mm9_biomart_chrRN_ensembl.rdata")
quit(save="no")
```

```
EOF
```

```
/panfs/roc/groups/10/bardwell/shared/R/R-3.0.1/bin/R --no-save < summarizeOverlaps.r
```

Once this is done, you can just reload in the counts which are saved in the genehits variable in this file. This section removes all the genes that are not expressed (Total Reads across all samples < 10)

```
load("/mnt/afp/teng/data/120313_DMRT6_counts_mm9_biomart_chrRN_ensembl.rdata")
str(genehits)
```

```
## Formal class 'SummarizedExperiment' [package "GenomicRanges"] with 4 slots
## ..@ exptData:Formal class 'SimpleList' [package "IRanges"] with 4 slots
## .. ..@ listData      : list()
## .. ..@ elementType   : chr "ANY"
## .. ..@ elementMetadata: NULL
## .. ..@ metadata      : list()
## ..@ rowData :Formal class 'GRangesList' [package "GenomicRanges"] with 5 slots
## .. ..@ unlistData    :Formal class 'GRanges' [package "GenomicRanges"] with 6 slots
## .. .. ..@ seqnames   :Formal class 'Rle' [package "IRanges"] with 4 slots
## .. .. .. ..@ values  : Factor w/ 21 levels "chr1","chr2",...: 3 20 16 7 20 11 6 13 4 9 ...
## .. .. .. ..@ lengths  : int [1:25890] 9 9 24 15 56 32 7 4 51 5 ...
## .. .. ..@ elementMetadata: NULL
## .. .. ..@ metadata    : list()
## .. .. ..@ ranges      :Formal class 'IRanges' [package "IRanges"] with 6 slots
## .. .. .. ..@ start    : int [1:415076] 107910198 107912321 107914853 107915391 107918681 1
## .. .. .. ..@ width    : int [1:415076] 2037 210 154 130 129 158 142 43 259 214 ...
## .. .. .. ..@ NAMES    : NULL
## .. .. .. ..@ elementType : chr "integer"
## .. .. .. ..@ elementMetadata: NULL
## .. .. .. ..@ metadata   : list()
## .. .. .. ..@ strand    :Formal class 'Rle' [package "IRanges"] with 4 slots
## .. .. .. .. ..@ values  : Factor w/ 3 levels "+","-","*": 2 1 2 1 2 1 2 1 2 1 ...
## .. .. .. .. ..@ lengths  : int [1:18288] 57 175 15 37 95 115 7 32 28 47 ...
## .. .. .. ..@ elementMetadata: NULL
## .. .. .. ..@ metadata    : list()
```

```

## ..@ elementMetadata:Formal class 'DataFrame' [package "IRanges"] with 6 slots
## ..@ rownames : NULL
## ..@ nrows : int 415076
## ..@ listData :List of 2
## ..$ exon_id : int [1:415076] 82094 82095 82096 82097 82098 82099 82100 82101 82102 ...
## ..$ exon_name: chr [1:415076] "ENSMUSE00000363317" "ENSMUSE00000404895" "ENSMUSE00000404896" ...
## ..@ elementType : chr "ANY"
## ..@ elementMetadata: NULL
## ..@ metadata : list()
## ..@ seqinfo :Formal class 'Seqinfo' [package "GenomicRanges"] with 4 slots
## ..@ seqnames : chr [1:21] "chr1" "chr2" "chr3" "chr4" ...
## ..@ seqlengths : int [1:21] NA ...
## ..@ is_circular: logi [1:21] NA NA NA NA NA NA ...
## ..@ genome : chr [1:21] NA NA NA NA ...
## ..@ metadata : list()
## ..@ elementMetadata:Formal class 'DataFrame' [package "IRanges"] with 6 slots
## ..@ rownames : NULL
## ..@ nrows : int 37583
## ..@ listData : Named list()
## ..@ elementType : chr "ANY"
## ..@ elementMetadata: NULL
## ..@ metadata : list()
## ..@ partitioning :Formal class 'PartitioningByEnd' [package "IRanges"] with 5 slots
## ..@ end : int [1:37583] 9 18 42 57 113 129 145 152 156 207 ...
## ..@ NAMES : chr [1:37583] "ENSMUSG00000000001" "ENSMUSG00000000003" "ENSMUSG00000000004" ...
## ..@ elementType : chr "integer"
## ..@ elementMetadata: NULL
## ..@ metadata : list()
## ..@ elementType : chr "GRanges"
## ..@ metadata :List of 1
## ..$ genomeInfo:List of 20
## ..$ Db type : chr "TranscriptDb"
## ..$ Supporting package : chr "GenomicFeatures"
## ..$ Data source : chr "BioMart"
## ..$ Organism : chr "Mus musculus"
## ..$ Resource URL : chr "may2012.archive.ensembl.org:80"
## ..$ BioMart database : chr "ENSEMBL_MART_ENSEMBL"
## ..$ BioMart database version : chr "Ensembl Genes 67"
## ..$ BioMart dataset : chr "mmusculus_gene_ensembl"
## ..$ BioMart dataset description : chr "Mus musculus genes (NCBIM37)"
## ..$ BioMart dataset version : chr "NCBIM37"
## ..$ Full dataset : chr "yes"
## ..$ mirBase build ID : chr NA
## ..$ transcript_nrow : chr "97639"
## ..$ exon_nrow : chr "416230"
## ..$ cds_nrow : chr "318339"
## ..$ Db created by : chr "GenomicFeatures package from Bioconductor"
## ..$ Creation time : chr "2013-09-16 22:47:51 -0500 (Mon, 16 Sep 2013 17:47:51 -0500)"
## ..$ GenomicFeatures version at creation time: chr "1.12.3"
## ..$ RSQLite version at creation time : chr "0.11.4"
## ..$ DBSCHEMAVERSION : chr "1.0"
## ..@ colData :Formal class 'DataFrame' [package "IRanges"] with 6 slots
## ..@ rownames : chr [1:6] "/home/bardwell/gearhart/dmrt6/1663_1_DM6_WT_ATCACG.bam" "/home/bardwell/gearhart/dmrt6/1663_1_DM6_WT_ATCACG.bam" ...
## ..@ nrows : int 6
## ..@ listData :List of 1
## ..$ fileName:Formal class 'BamFileList' [package "Rsamtools"] with 4 slots
## ..@ listData :List of 6
## ..$ /home/bardwell/gearhart/dmrt6/1663_1_DM6_WT_ATCACG.bam :Reference class 'BamFile'
## ..$ .extptr :<externalptr>
## ..$ path : chr "/home/bardwell/gearhart/dmrt6/1663_1_DM6_WT_ATCACG.bam"

```

```

## . . . . . $ index : chr "/home/bardwell/gearhart/dmrt6/1663_1_DM6_WT_ATCACG.bam"
## . . . . . $ yieldSize: int NA
## . . . . . $ obeyQname: logi FALSE
## . . . . . and 12 methods, . . . . . $ /home/bardwell/gearhart/dmrt6/1663_2_DM6_Nu
## . . . . . $ .extptr :<externalptr>
## . . . . . $ path : chr "/home/bardwell/gearhart/dmrt6/1663_2_DM6_Null_CGATGT.bam"
## . . . . . $ index : chr "/home/bardwell/gearhart/dmrt6/1663_2_DM6_Null_CGATGT.bam"
## . . . . . $ yieldSize: int NA
## . . . . . $ obeyQname: logi FALSE
## . . . . . and 12 methods, . . . . . $ /home/bardwell/gearhart/dmrt6/1663_3_DM6_WT
## . . . . . $ .extptr :<externalptr>
## . . . . . $ path : chr "/home/bardwell/gearhart/dmrt6/1663_3_DM6_WT_TTAGGC.bam"
## . . . . . $ index : chr "/home/bardwell/gearhart/dmrt6/1663_3_DM6_WT_TTAGGC.bam"
## . . . . . $ yieldSize: int NA
## . . . . . $ obeyQname: logi FALSE
## . . . . . and 12 methods, . . . . . $ /home/bardwell/gearhart/dmrt6/1663_4_DM6_WT
## . . . . . $ .extptr :<externalptr>
## . . . . . $ path : chr "/home/bardwell/gearhart/dmrt6/1663_4_DM6_WT_TGACCA.bam"
## . . . . . $ index : chr "/home/bardwell/gearhart/dmrt6/1663_4_DM6_WT_TGACCA.bam"
## . . . . . $ yieldSize: int NA
## . . . . . $ obeyQname: logi FALSE
## . . . . . and 12 methods, . . . . . $ /home/bardwell/gearhart/dmrt6/1663_5_DM6_Nu
## . . . . . $ .extptr :<externalptr>
## . . . . . $ path : chr "/home/bardwell/gearhart/dmrt6/1663_5_DM6_Null_ACAGTG.bam"
## . . . . . $ index : chr "/home/bardwell/gearhart/dmrt6/1663_5_DM6_Null_ACAGTG.bam"
## . . . . . $ yieldSize: int NA
## . . . . . $ obeyQname: logi FALSE
## . . . . . and 12 methods, . . . . . $ /home/bardwell/gearhart/dmrt6/1665_2_DM6_Nu
## . . . . . $ .extptr :<externalptr>
## . . . . . $ path : chr "/home/bardwell/gearhart/dmrt6/1665_2_DM6_Null_GCCAAT.bam"
## . . . . . $ index : chr "/home/bardwell/gearhart/dmrt6/1665_2_DM6_Null_GCCAAT.bam"
## . . . . . $ yieldSize: int NA
## . . . . . $ obeyQname: logi FALSE
## . . . . . and 12 methods, . . . . . @ elementType : chr "BamFile"
## . . . . . @ elementMetadata: NULL
## . . . . . @ metadata : list()
## . . . . . @ elementType : chr "ANY"
## . . . . . @ elementMetadata: NULL
## . . . . . @ metadata : list()
## ..@ assays :Reference class 'ShallowSimpleListAssays' [package "GenomicRanges"] with 1 fields
## .. $ data:Formal class 'SimpleList' [package "IRanges"] with 4 slots
## .. .@ listData :List of 1
## .. . $ counts: int [1:37583, 1:6] 7056 0 1443 10239 11435 2 1196 944 2018 684 ...
## .. .@ elementType : chr "ANY"
## .. .@ elementMetadata: NULL
## .. .@ metadata : list()
## ..and 12 methods,

```

```

temp = assays(genehits)$counts
colnames(temp)

```

```

## [1] "/home/bardwell/gearhart/dmrt6/1663_1_DM6_WT_ATCACG.bam"
## [2] "/home/bardwell/gearhart/dmrt6/1663_2_DM6_Null_CGATGT.bam"
## [3] "/home/bardwell/gearhart/dmrt6/1663_3_DM6_WT_TTAGGC.bam"
## [4] "/home/bardwell/gearhart/dmrt6/1663_4_DM6_WT_TGACCA.bam"
## [5] "/home/bardwell/gearhart/dmrt6/1663_5_DM6_Null_ACAGTG.bam"
## [6] "/home/bardwell/gearhart/dmrt6/1665_2_DM6_Null_GCCAAT.bam"

```

```

colnames(temp) <- c("WT_R1", "Null_R1", "WT_R2", "WT_R3", "Null_R2",
"Null_R3")

```



```
big10 = apply(temp, 1, sum) > 10
TotalReads = temp[big10, ]
nrow(TotalReads)
```

```
## [1] 22744
```

```
colnames(TotalReads)
```

```
## [1] "WT_R1" "Null_R1" "WT_R2" "WT_R3" "Null_R2"
## [6] "Null_R3"
```

We will also use biomaRt to get annotations for all the mouse Ensembl genes. Namely we want EntrezIDs and MGI data and positions in the genome.

```
ensembl = useMart(host = "may2012.archive.ensembl.org", biomart = "ENSEMBL_MART_ENSEMBL",
  dataset = "mmusculus_gene_ensembl")
# filters = listFilters(ensembl) filters[1:100,] attributes =
# listAttributes(ensembl) attributes[1:100,]
```

```
myattributes <- c("ensembl_gene_id", "mgi_id", "mgi_symbol",
  "chromosome_name", "start_position", "end_position", "strand",
  "entrezgene")
# test on a few genes
annot = getBM(attributes = myattributes, filters = "ensembl_gene_id",
  values = c("ENSMUSG00000040363", "ENSMUSG00000017652"), mart = ensembl)
head(annot)
```

```
##      ensembl_gene_id      mgi_id mgi_symbol chromosome_name
## 1 ENSMUSG00000017652  MGI:88336      Cd40             2
## 2 ENSMUSG00000040363 MGI:1918708      Bcor              X
##      start_position end_position strand entrezgene
## 1      164881127     164898448      1          21939
## 2      11613866     11737481      -1          71458
```

Define a function to Extract Mouse Gene Names from Human Entrez IDs which we need for parsing Incomplete Ingenuity Data

```
ensemblHuman = useMart(biomart = "ensembl", dataset = "hsapiens_gene_ensembl")
# filtersHuman = listFilters(ensemblHuman)
# filtersHuman[grep('Entrez', filtersHuman[,2]),]
# filtersHuman[grep('with_homolog', filtersHuman[,1]),]
# filtersHuman[1:10,] attributesHuman =
# listAttributes(ensemblHuman)
# attributesHuman[grep('homolog_ensembl_gene', attributes[,1]),]
myattributesHuman <- c("ensembl_gene_id", "mmusculus_homolog_ensembl_gene")
getBM(attributes = myattributesHuman, filters = c("entrezgene",
  "with_homolog_mmus"), values = list(c("54880"), TRUE), mart = ensemblHuman)
```

```
##      ensembl_gene_id mmusculus_homolog_ensembl_gene
## 1 ENSG00000183337      ENSMUSG00000040363
```

```
# Define a Function to do this on-the-fly below
```

```
humanEntrezToMouseEnsemble <- function(xyz) {
  getBM(attributes = myattributesHuman, filters = c("entrezgene",
    "with_homolog_mmus"), values = list(xyz, TRUE), mart = ensemblHuman)
}
```

Create an annotation matrix for genes in Total Reads

```
annot <- getBM(attributes = myattributes, filters = "ensembl_gene_id",
  values = rownames(TotalReads), mart = ensembl)
annot <- annot[!duplicated(annot[, "ensembl_gene_id"]), ]
rownames(annot) <- annot[, "ensembl_gene_id"]
new_annot <- as.data.frame(TotalReads)
new_annot$ensembl_gene_id <- rownames(new_annot)
# annotation has to be in teh same order as TotalReads
new_annot <- merge(new_annot, annot)
rownames(new_annot) <- rownames(TotalReads)
str(new_annot)

## 'data.frame': 22744 obs. of 14 variables:
## $ ensembl_gene_id: chr "ENSMUSG00000000001" "ENSMUSG00000000028" "ENSMUSG00000000031" "ENSMUSG00000000037"
## $ WT_R1 : int 7056 1443 10239 11435 2 1196 944 2018 684 1227 ...
## $ Null_R1 : int 8128 1830 10646 12437 2 1429 847 2752 812 1534 ...
## $ WT_R2 : int 9178 2164 11908 15461 4 1544 997 2658 761 1701 ...
## $ WT_R3 : int 7908 2172 12174 13101 6 1391 817 2340 732 1577 ...
## $ Null_R2 : int 8126 1856 11199 13838 18 1533 1336 2368 690 1323 ...
## $ Null_R3 : int 6418 1752 9946 12395 0 1228 638 2153 1131 1344 ...
## $ mgi_id : chr "MGI:95773" "MGI:1338073" "MGI:95891" "MGI:1340042" ...
## $ mgi_symbol : chr "Gnai3" "Cdc45" "H19" "Scml2" ...
## $ chromosome_name: chr "3" "16" "7" "X" ...
## $ start_position : int 107910198 18780540 149761434 157555125 108204668 121098567 17231185 5860735 120077
## $ end_position : int 107949064 18812080 149764048 157696145 108275710 121117170 17239115 5869639 120202
## $ strand : int -1 -1 -1 1 1 1 1 1 1 ...
## $ entrezgene : int 14679 12544 NA 107815 11818 67608 12390 23849 29871 12858 ...
```

Create a function that will take a list of gene symbols and a query term and then return the number of publications in Pubmed and a URL to those publications.

```
pubmedBatchQuery <- function(temp, qt) {
  output = data.frame()
  for (i in 1:length(temp)) {
    # query=paste0(temp[i,'mgi_symbol'],' AND ',qt)
    query = paste0(temp[i], " AND ", qt)
    query = gsub("\\s+", "+", query)
    url = paste0("http://eutils.ncbi.nlm.nih.gov/entrez/eutils/",
      "esearch.fcgi?retmax=50000&db=pubmed&term=", query)
    datafile = tempfile(pattern = "pub")
    try(download.file(url, destfile = datafile, method = "internal",
      mode = "wb", quiet = TRUE), silent = TRUE)
    xml <- xmlTreeParse(datafile, asTree = TRUE)
    nid = xmlValue(xmlElementsByTagName(xmlRoot(xml), "Count")[[1]])
    lid = xmlElementsByTagName(xmlRoot(xml), "IdList", recursive = TRUE)[[1]]
    pid = paste(unlist(lapply(xmlElementsByTagName(lid, "Id"),
      xmlValue)), sep = ":")
    # print(c(hit_list[i],nid,pid))
    output[i, "PubMed"] = nid
    output[i, "URL"] = paste0("http://www.ncbi.nlm.nih.gov/pubmed/?term=",
      query)
  }
  return(output)
}

# Test it out
pubmedBatchQuery(c("Dmrt1", "Sox9"), "Testis")
```

```
## PubMed
## 1 188
## 2 425
## URL
## 1 http://www.ncbi.nlm.nih.gov/pubmed/?term=Dmrt1+AND+Testis
## 2 http://www.ncbi.nlm.nih.gov/pubmed/?term=Sox9+AND+Testis
```

Use EdgeR to find differentially expressed genes.

```
group = factor(unlist(strsplit(colnames(TotalReads), "_"))[seq(from = 1,
  to = 2 * length(colnames(TotalReads)), by = 2)])
group
```

```
## [1] WT Null WT WT Null Null
## Levels: Null WT
```

```
d = DGEList(counts = TotalReads, group = group, genes = new_annot)
design <- model.matrix(~0 + group)
design
```

```
## groupNull groupWT
## 1 0 1
## 2 1 0
## 3 0 1
## 4 0 1
## 5 1 0
## 6 1 0
## attr("assign")
## [1] 1 1
## attr("contrasts")
## attr("contrasts")$group
## [1] "contr.treatment"
```

```
d <- calcNormFactors(d)
d$samples
```

```
## group lib.size norm.factors
## WT_R1 WT 23768316 1.0026
## Null_R1 Null 26170933 1.0050
## WT_R2 WT 29046494 1.0073
## WT_R3 WT 27493481 0.9986
## Null_R2 Null 27369348 1.0082
## Null_R3 Null 26321829 0.9786
```

```
d <- estimateCommonDisp(d)
d$common.dispersion
```

```
## [1] 0.04091
```

```
d <- estimateTagwiseDisp(d)
et <- exactTest(d, pair = c("WT", "Null"))
summary(de <- decideTestsDGE(et, p = 0.05, adjust = "BH"))
```

```
## [,1]
## -1 7
## 0 22721
## 1 16
```

```

tt <- topTags(et, n = 20, sort.by = "PValue", adjust.method = "BH")
detags <- rownames(d)[as.logical(de)]
plotSmear(et, de.tags = detags)
abline(h = c(-2, 2), col = "blue")

```

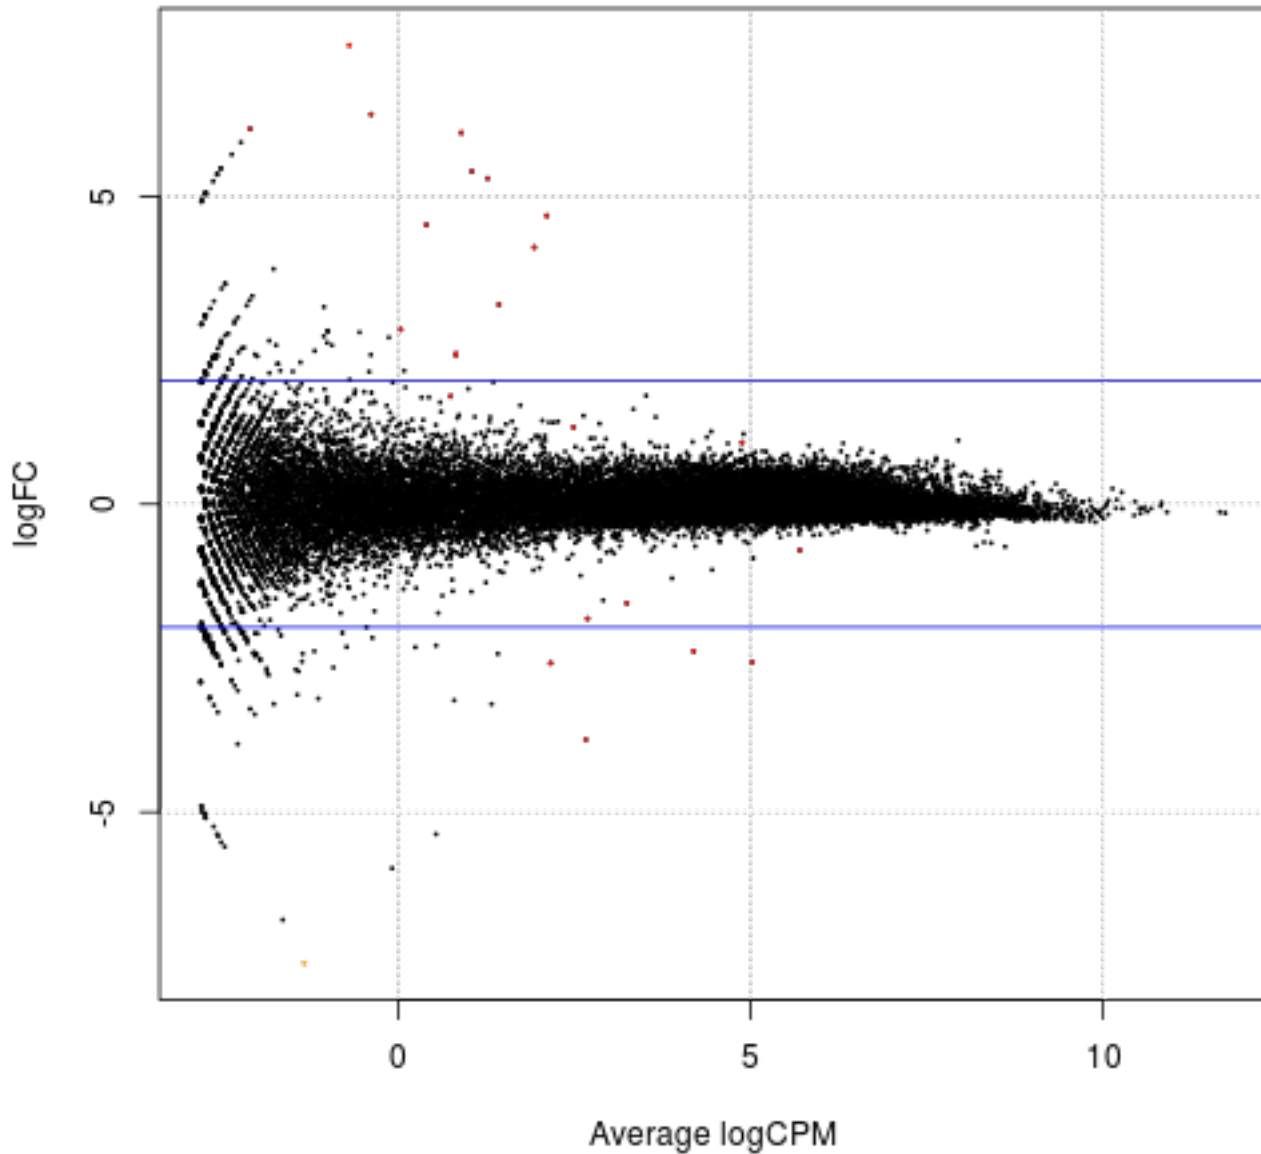

Figure 1: plot of chunk EdgeR

```

keep <- as.logical(de >= 1)
up = d[keep, ]
upt <- exactTest(up, pair = c("WT", "Null"))
uptt <- topTags(upt, n = 200, sort.by = "logFC", adjust.method = "BH")$table

```

Use EdgeR to build a GLM

```

D <- d
D <- estimateGLMCommonDisp(d, design)

```

```
# D <- estimateGLMTrendedDisp(d, design)
D <- estimateGLMTagwiseDisp(d, design)
plot(d$tag, D$tag, xlab = "ordinary dispersion", ylab = "GLM dispersion")
```

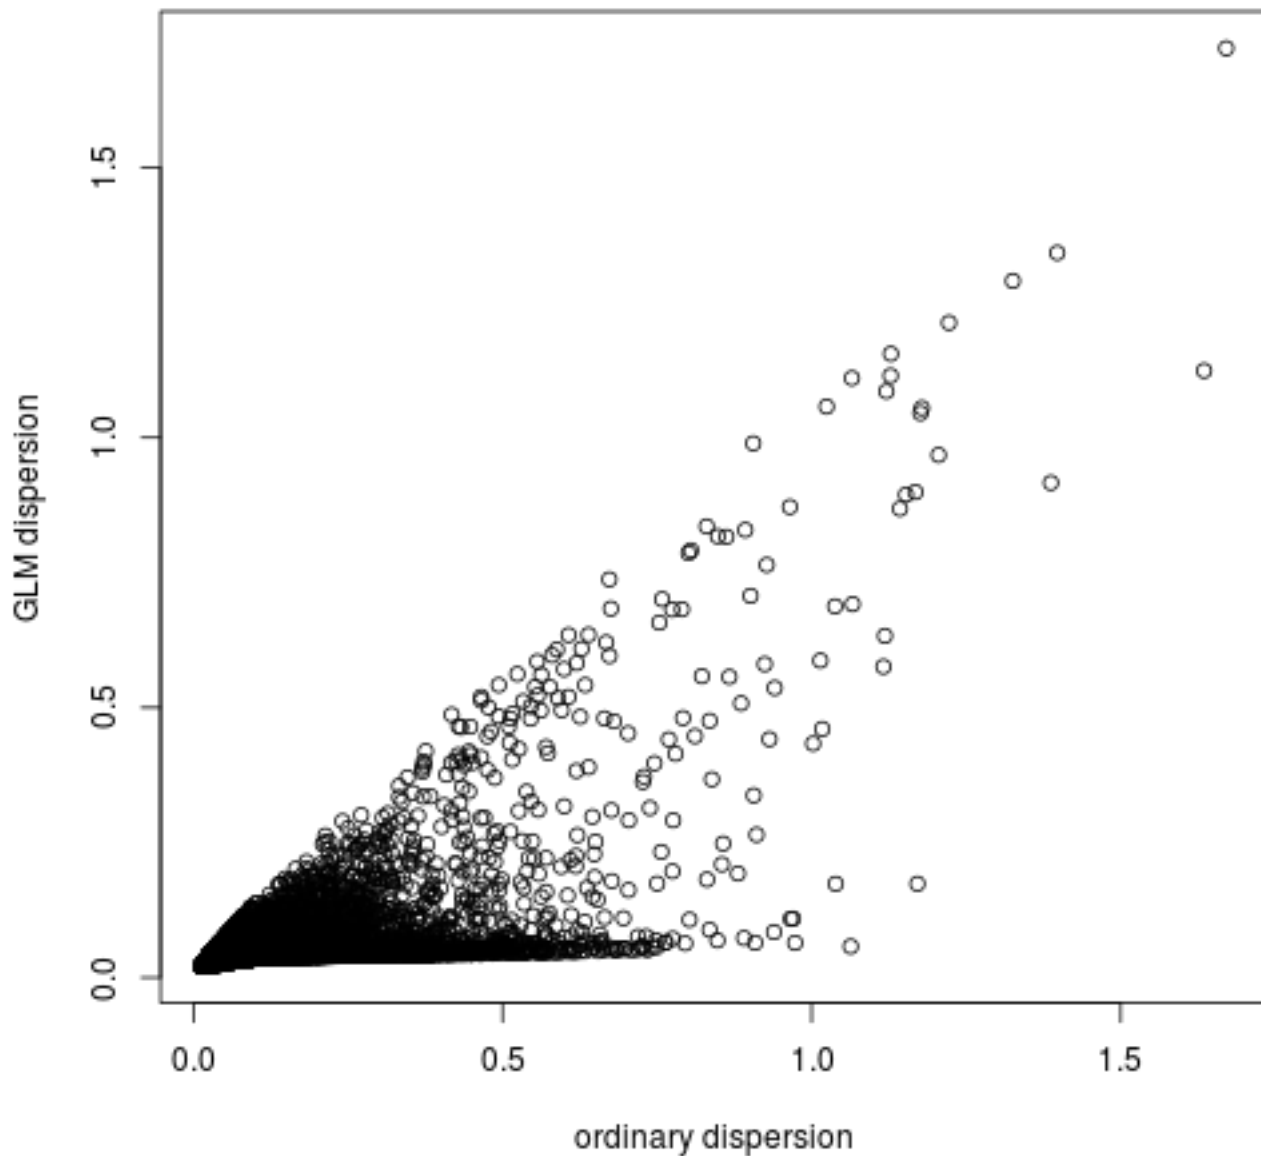

Figure 2: plot of chunk GLM

```
D_fit <- glmFit(D, design)
colnames(design)

## [1] "groupNull" "groupWT"

D6 <- c(1, -1)
lrt.D6 = glmLRT(D_fit, contrast = D6)
head(lrt.D6$table)
```

```

##          logFC logCPM      LR PValue
## ENSMUSG000000000001 -0.07439  8.189  0.15962  0.6895
## ENSMUSG0000000000028 -0.06068  6.126  0.09963  0.7523
## ENSMUSG0000000000031 -0.09707  8.690  0.31132  0.5769
## ENSMUSG0000000000037 -0.02933  8.937  0.02789  0.8674
## ENSMUSG0000000000049  0.71888 -1.867  1.04772  0.3060
## ENSMUSG0000000000056  0.03653  5.699  0.04014  0.8412

```

plotMDS(D)

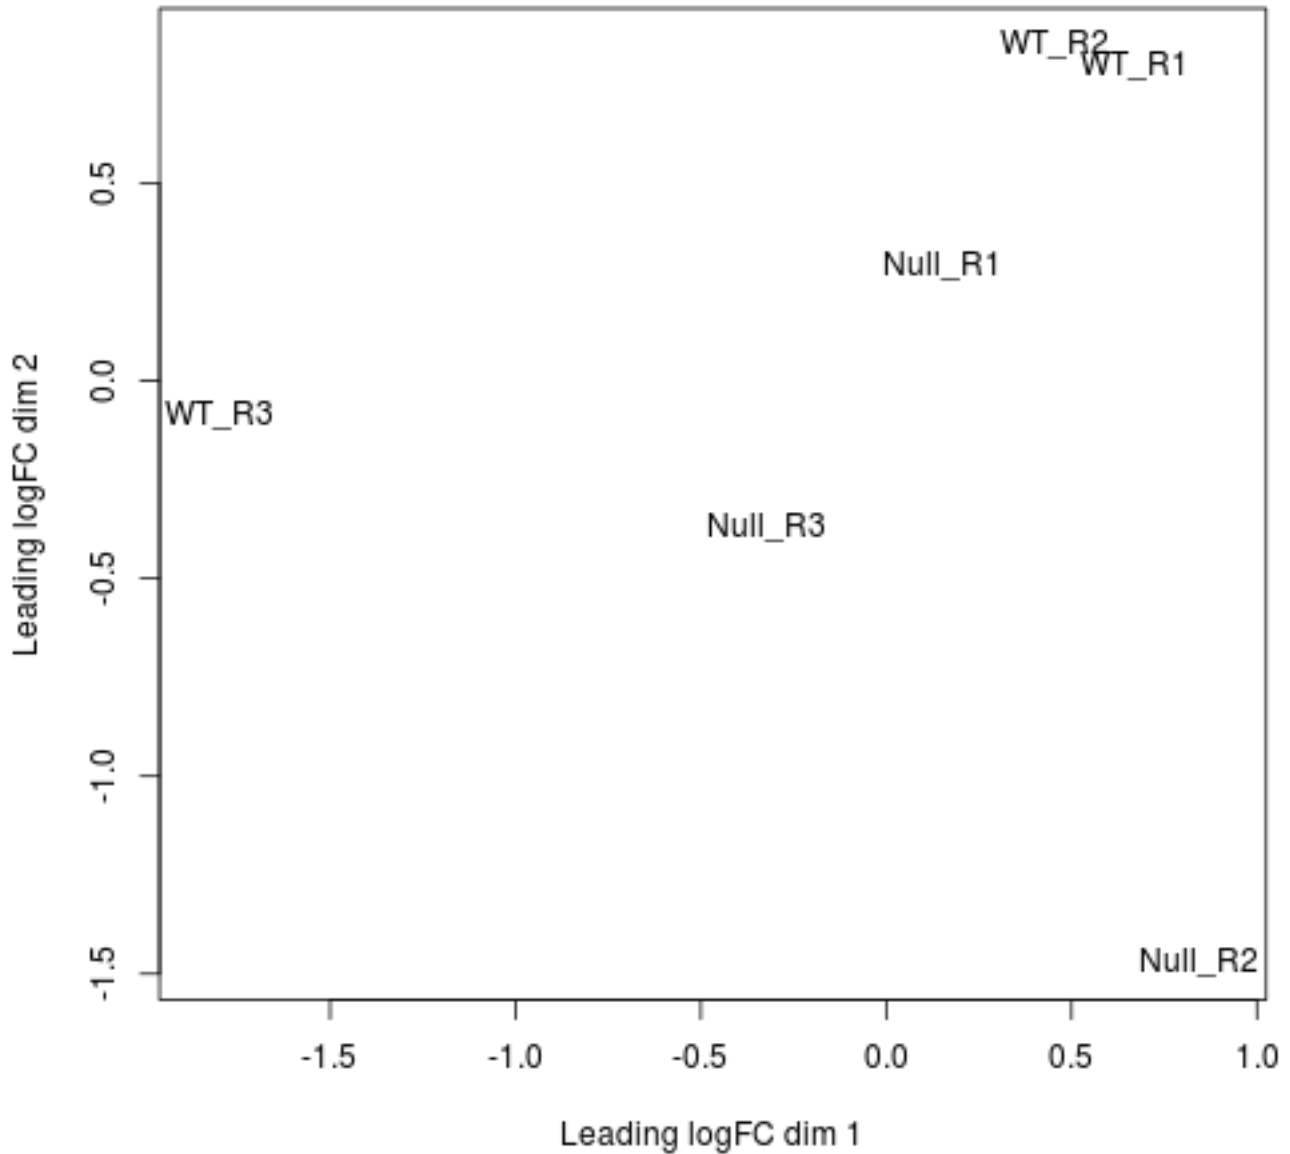

Figure 3: plot of chunk GLM

plotBCV(D)

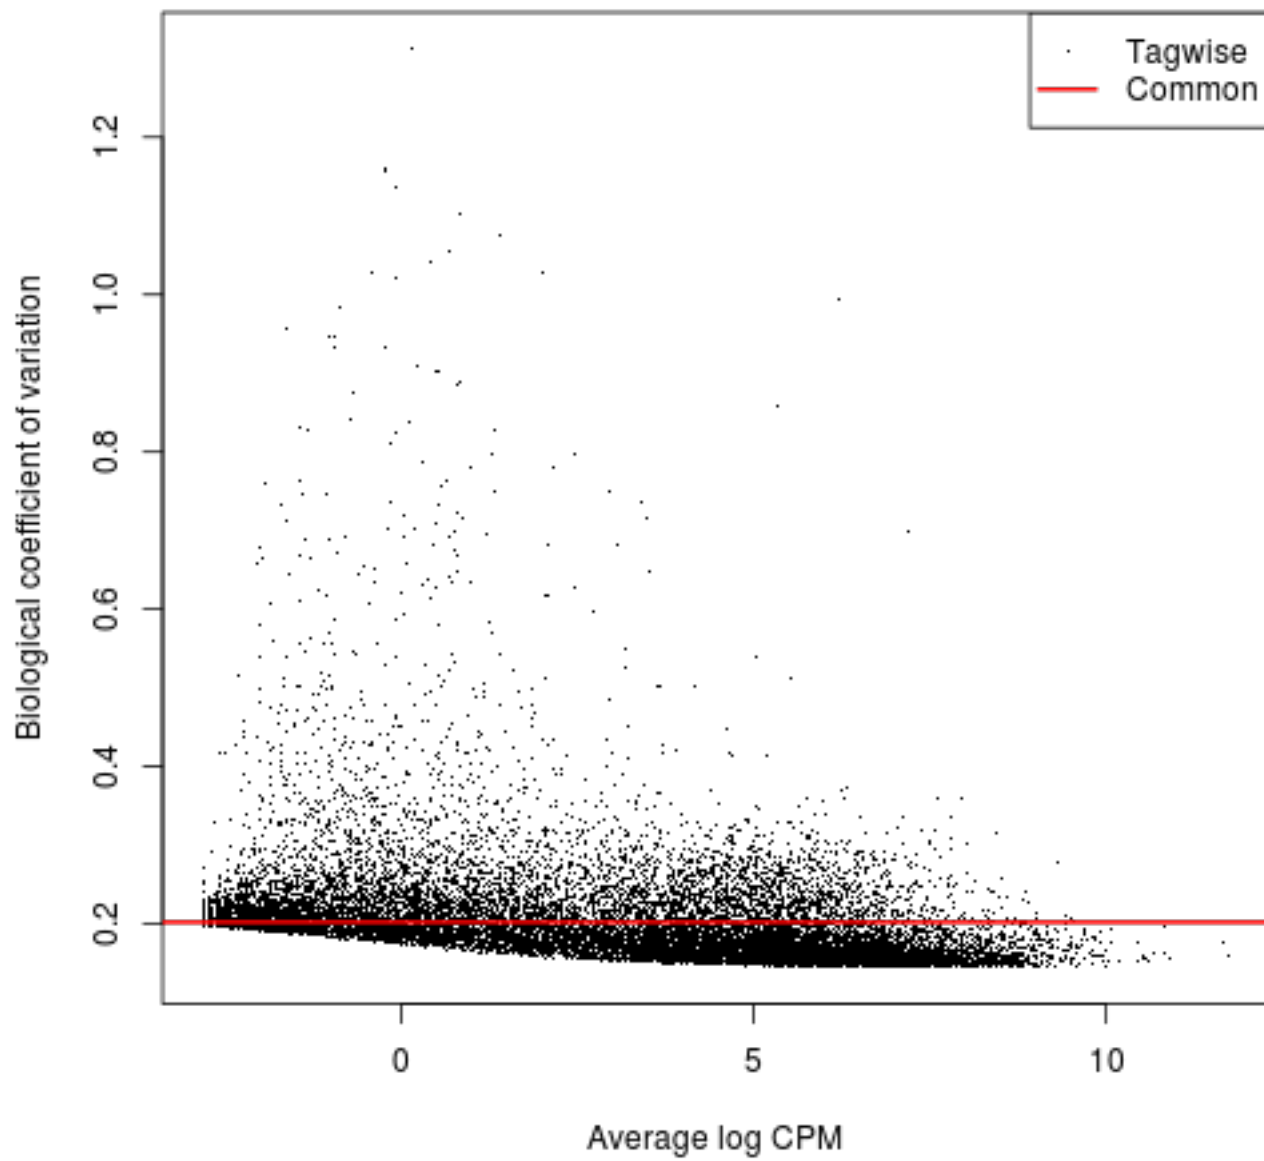

Figure 4: plot of chunk GLM

```

# PlotSmear: LogFC as a function of logCPM
summary(de <- decideTestsDGE(lrt.D6, p = 0.05, adjust = "BH"))

##      [,1]
## -1     43
##  0  22642
##  1     59

de.lrt <- rownames(D)[as.logical(de)]
plotSmear(lrt.D6, de.tags = de.lrt)

```

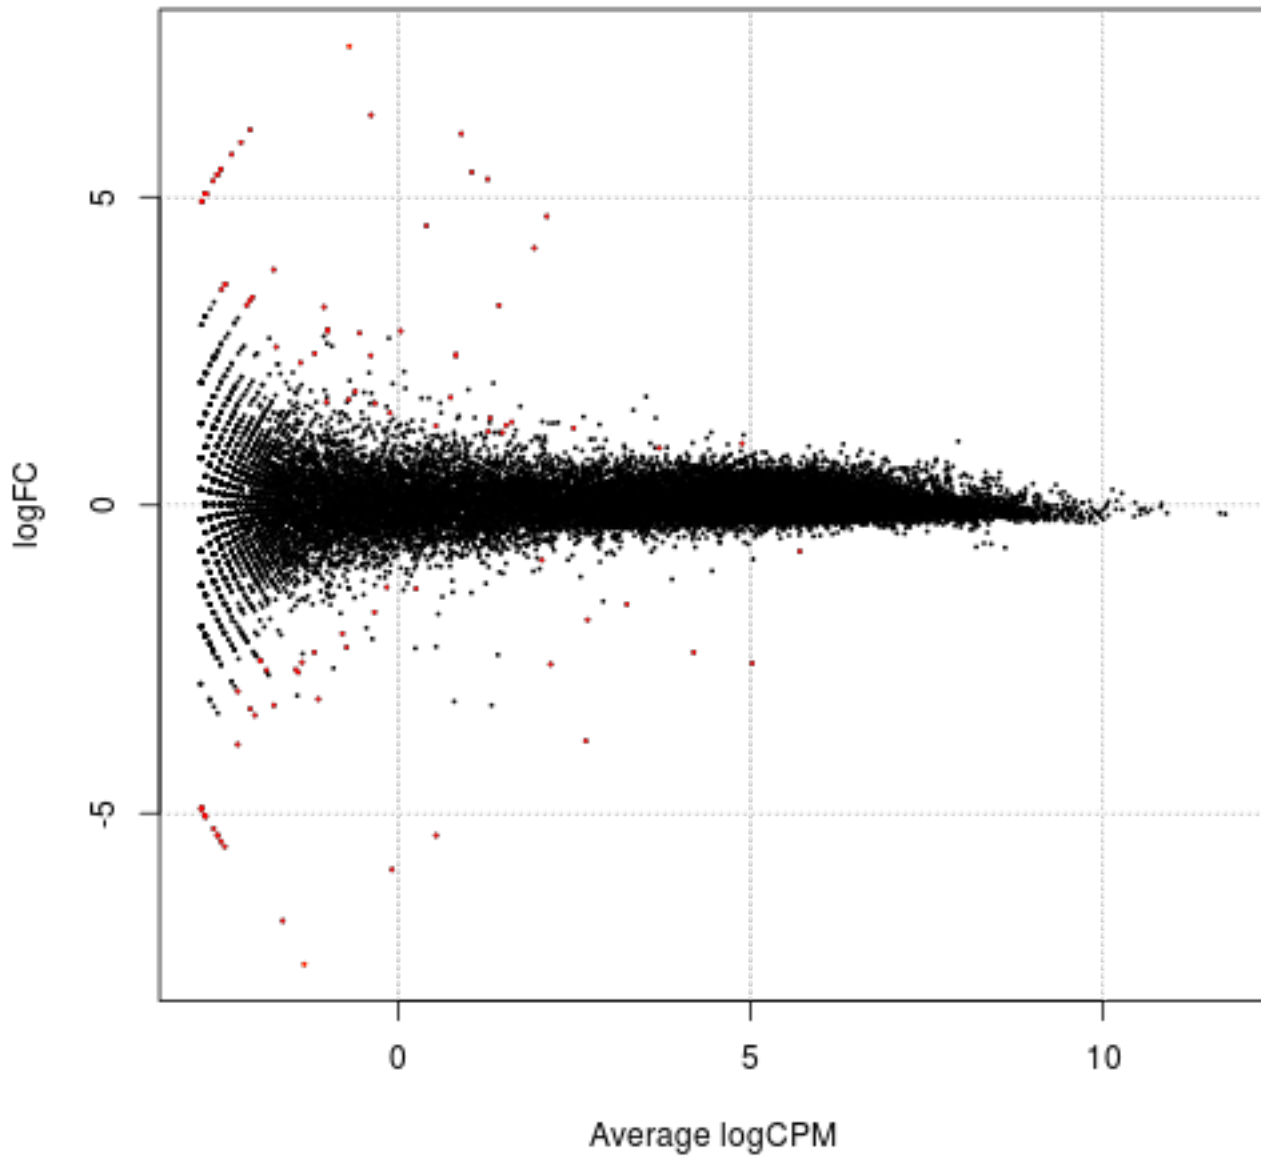

Figure 5: plot of chunk GLM

```

D6tt <- topTags(lrt.D6, n = Inf, sort.by = "none", adjust.method = "BH")$table
hist(D6tt$PValue, main = "PValue Distribution")

```



## PValue Distribution

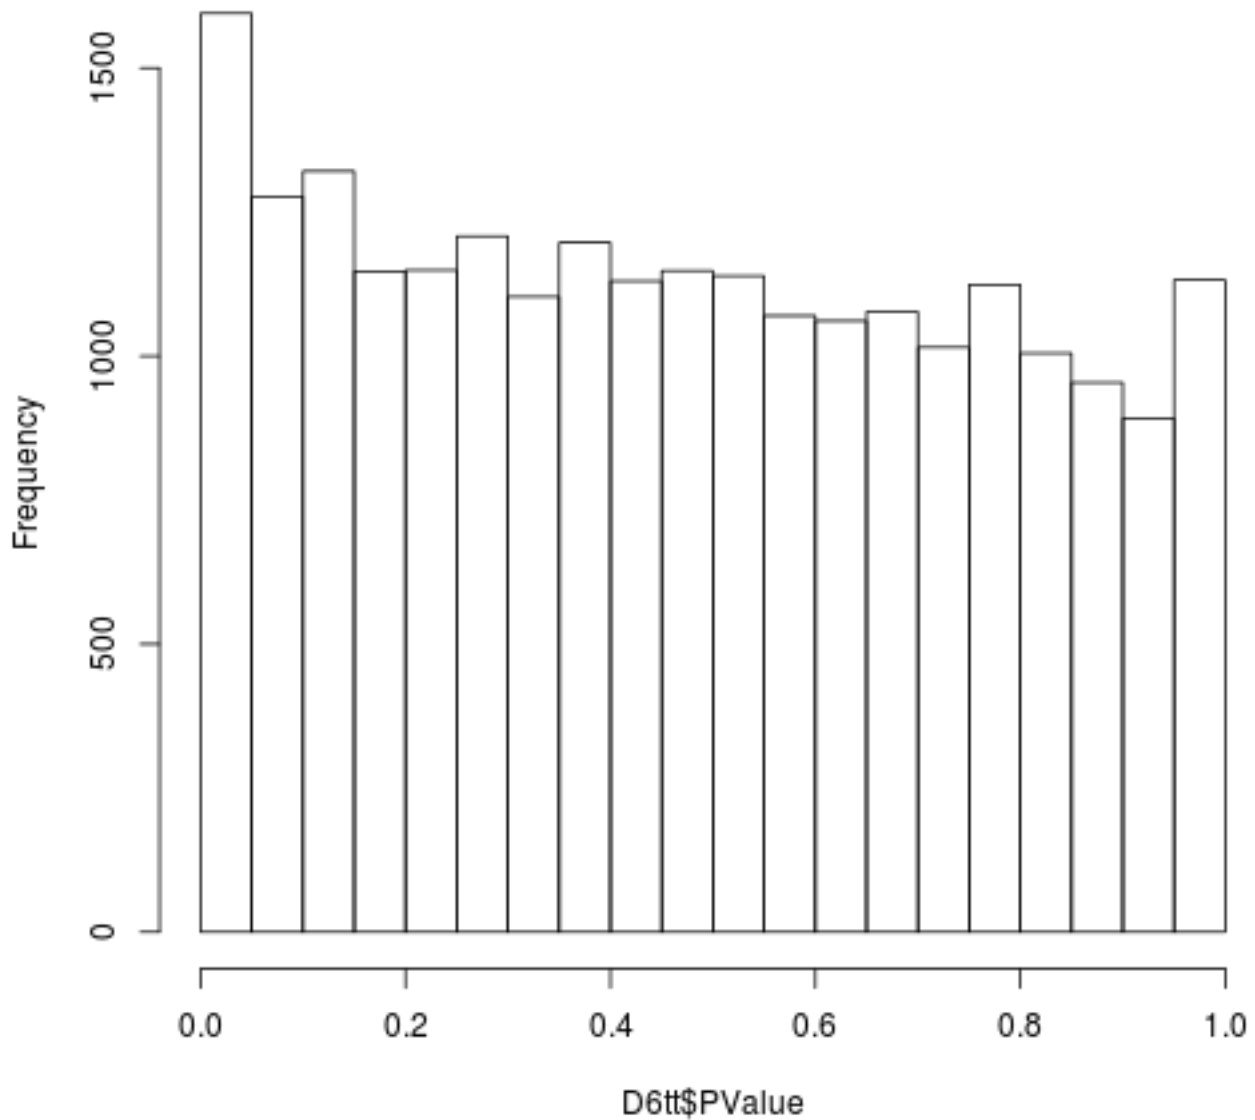

Figure 6: plot of chunk GLM

```
D6tt$qvalue <- qvalue(D6tt$PValue)$q
head(D6tt)
```

```
##           ensembl_gene_id WT_R1 Null_R1 WT_R2
## ENSMUSG00000000001 ENSMUSG00000000001 7056 8128 9178
## ENSMUSG00000000028 ENSMUSG00000000028 1443 1830 2164
## ENSMUSG00000000031 ENSMUSG00000000031 10239 10646 11908
## ENSMUSG00000000037 ENSMUSG00000000037 11435 12437 15461
## ENSMUSG00000000049 ENSMUSG00000000049 2 2 4
## ENSMUSG00000000056 ENSMUSG00000000056 1196 1429 1544
##           WT_R3 Null_R2 Null_R3 mgi_id
## ENSMUSG00000000001 7908 8126 6418 MGI:95773
## ENSMUSG00000000028 2172 1856 1752 MGI:1338073
## ENSMUSG00000000031 12174 11199 9946 MGI:95891
```

```

## ENSMUSG00000000037 13101 13838 12395 MGI:1340042
## ENSMUSG00000000049 6 18 0 MGI:88058
## ENSMUSG00000000056 1391 1533 1228 MGI:1914858
##
## mgi_symbol chromosome_name
## ENSMUSG00000000001 Gnai3 3
## ENSMUSG00000000028 Cdc45 16
## ENSMUSG00000000031 H19 7
## ENSMUSG00000000037 Scml2 X
## ENSMUSG00000000049 Apoh 11
## ENSMUSG00000000056 Narf 11
##
## start_position end_position strand
## ENSMUSG00000000001 107910198 107949064 -1
## ENSMUSG00000000028 18780540 18812080 -1
## ENSMUSG00000000031 149761434 149764048 -1
## ENSMUSG00000000037 157555125 157696145 1
## ENSMUSG00000000049 108204668 108275710 1
## ENSMUSG00000000056 121098567 121117170 1
##
## entrezgene logFC logCPM LR
## ENSMUSG00000000001 14679 -0.07439 8.189 0.15962
## ENSMUSG00000000028 12544 -0.06068 6.126 0.09963
## ENSMUSG00000000031 NA -0.09707 8.690 0.31132
## ENSMUSG00000000037 107815 -0.02933 8.937 0.02789
## ENSMUSG00000000049 11818 0.71888 -1.867 1.04772
## ENSMUSG00000000056 67608 0.03653 5.699 0.04014
##
## PValue FDR qvalue
## ENSMUSG00000000001 0.6895 0.9560 0.8376
## ENSMUSG00000000028 0.7523 0.9669 0.8471
## ENSMUSG00000000031 0.5769 0.9366 0.8206
## ENSMUSG00000000037 0.8674 0.9825 0.8608
## ENSMUSG00000000049 0.3060 0.8908 0.7804
## ENSMUSG00000000056 0.8412 0.9766 0.8556

```

```

# Volcano Plot - LogFC vs Pvalue
plot(D6tt$logFC, -1 * log10(D6tt$PValue), cex = 0.5, pch = 19,
     col = ifelse(rownames(D6tt) %in% de.lrt, "red", "black"),
     main = "Dmrt6 Differential Expression")

```

```

# Use one of the following selection criteria
# D6tt<-D6tt[grep('Rhox',D6tt$mgi_symbol),] D6tt<-D6tt[de !=
# 0,] D6tt<-D6tt[D6tt$ensembl_gene_id %in%
# dmrt6Anno$feature,]
D6tt <- D6tt[D6tt$PValue < 0.05, ]
# D6tt<-D6tt[abs(D6tt$logFC)>1,]

```

Use Griswold's Microarray data to look at the expression of these genes through spermatogenesis.

```

gset <- getGEO("GSE4193", destdir = "/mnt/afp/micah/R/dmrt6",
             GSEMatrix = TRUE)

## ftp://ftp.ncbi.nlm.nih.gov/geo/series/GSE4nnn/GSE4193/matrix/
## Found 1 file(s)
## GSE4193_series_matrix.txt.gz
## Using locally cached version: /mnt/afp/micah/R/dmrt6/GSE4193_series_matrix.txt.gz
## Using locally cached version of GPL1261 found here:
## /mnt/afp/micah/R/dmrt6/GPL1261.soft

```

### Dmrt6 Differential Expression

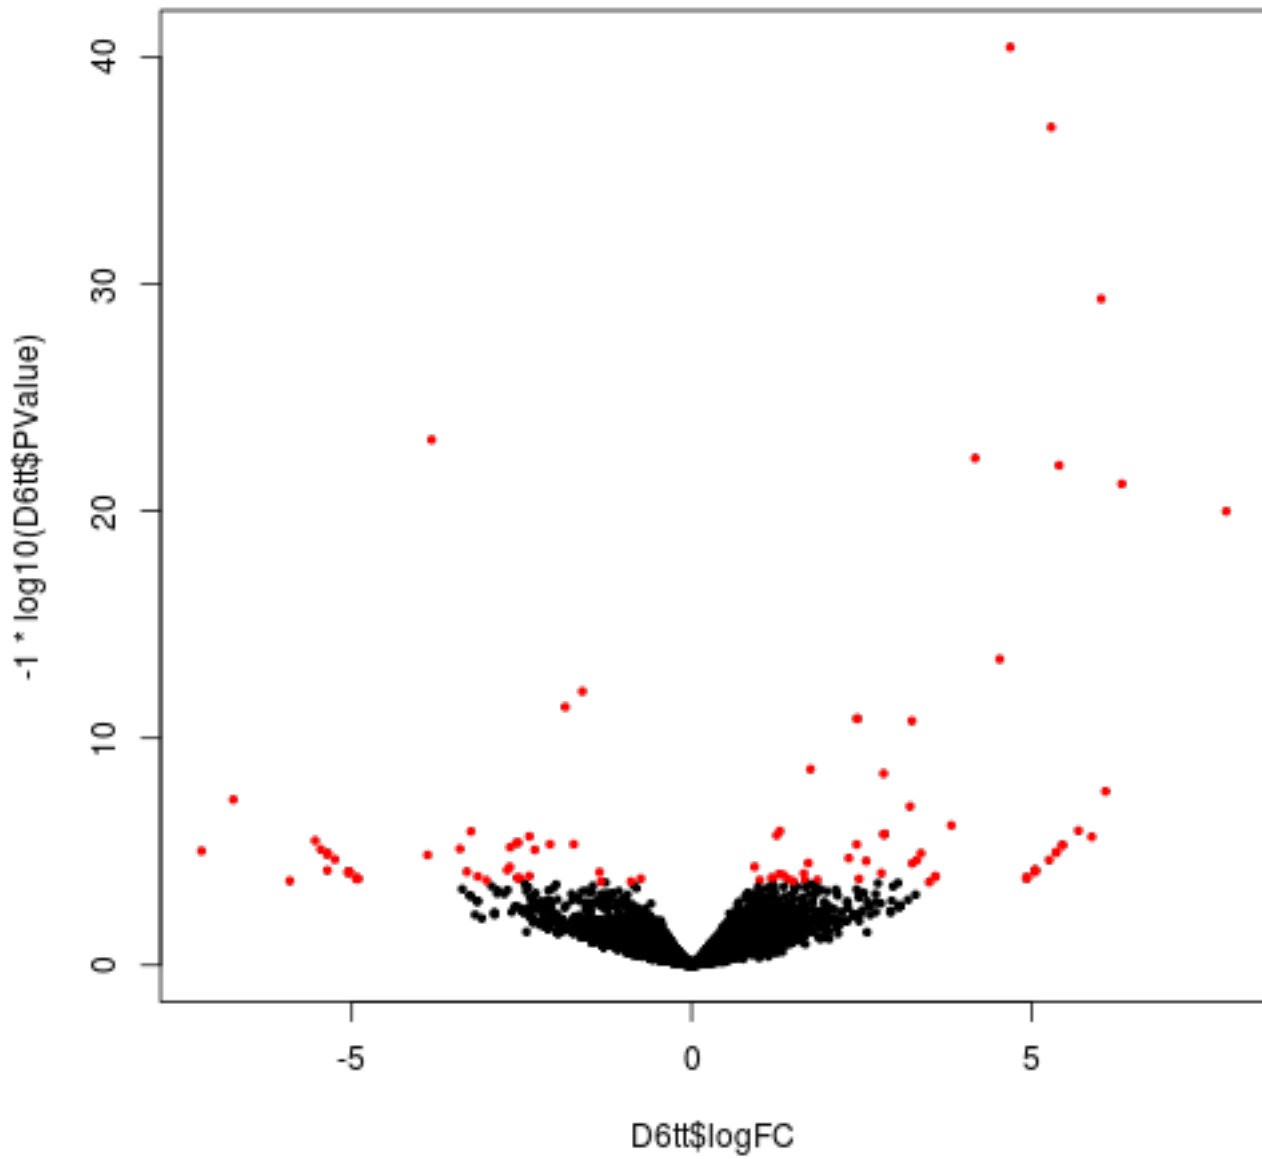

Figure 7: plot of chunk GLM



```

ex2 <- merge(ex, ncbifd, by.x = 0, by.y = "ID")
ex2 <- subset(ex2, select = c("Row.names", "A_R1", "A_R2", "B_R1",
  "B_R2", "P_R1", "P_R2", "R_R1", "R_R2", "Gene.ID", "Gene.symbol"))
# NCBI Entry got update in March 2014, presumably to replace
# the log value with the raw value
# ex2fA<-0.5*(2^ex2fA_R1+2^ex2fA_R2)
# ex2fB<-0.5*(2^ex2fB_R1+2^ex2fB_R2)
# ex2fP<-0.5*(2^ex2fP_R1+2^ex2fP_R2)
# ex2fR<-0.5*(2^ex2fR_R1+2^ex2fR_R2)
ex2fA <- 0.5 * (ex2fA_R1 + ex2fA_R2)
ex2fB <- 0.5 * (ex2fB_R1 + ex2fB_R2)
ex2fP <- 0.5 * (ex2fP_R1 + ex2fP_R2)
ex2fR <- 0.5 * (ex2fR_R1 + ex2fR_R2)
ex2fsum <- ex2fA + ex2fB
ex2 <- ex2[with(ex2, order(-sum)), ]
ex2fGene.ID <- as.numeric(as.character(ex2fGene.ID))

```

```
## Warning: NAs introduced by coercion
```

```

ex2fGene.symbol <- as.character(ex2fGene.symbol)
ex2f[grepl("Sohlh1", ex2fGene.symbol), ]

```

```

##      Row.names  A_R1  A_R2  B_R1  B_R2  P_R1  P_R2  R_R1
## 44308 1460015_at 374.9 531.4 465.4 266.8 71.8 74.7 91.8
##      R_R2 Gene.ID Gene.symbol      A      B      P      R
## 44308 74.7 227631      Sohlh1 453.1 366.1 73.25 83.25
##      sum
## 44308 819.2

```

```
nrow(ex2)
```

```
## [1] 45101
```

```
sum(!(duplicated(ex2[, "Gene.ID"])) & !is.na(ex2[, "Gene.ID"]))
```

```
## [1] 20992
```

```
# head(ex2[is.na(ex2[, 'Gene.ID']),]fGene.ID,n=50) rm(ex3)
```

```

ex3 <- ex2[!(duplicated(ex2[, "Gene.ID"])) & !is.na(ex2[, "Gene.ID"]),
]
head(ex3)

```

```

##      Row.names  A_R1  A_R2  B_R1  B_R2  P_R1
## 23165      1438859_x_at 6415 5679 5917 6338 5231
## 35396      1451101_a_at 5765 5053 5407 5737 3894
## 44873      1460581_a_at 5936 4941 5050 5966 3571
## 8941      1424635_at 5674 5080 5242 5743 5018
## 45078 AFX-b-ActinMur/M12481_3_at 5828 5243 4865 5502 3436
## 210      1415879_a_at 5763 4425 5121 5123 1765
##      P_R2  R_R1  R_R2 Gene.ID Gene.symbol      A      B      P
## 23165 5583 5998 6306 20090      Rps29 6047 6128 5407
## 35396 4186 4432 4456 54127      Rps28 5409 5572 4040
## 44873 3948 3206 3467 270106      Rpl13 5439 5508 3759
## 8941 5527 4578 5103 13627      Eef1a1 5377 5492 5272
## 45078 3704 3964 3448 11461      Actb 5536 5184 3570
## 210 2006 2248 2748 67186      Rplp2 5094 5122 1886
##      R      sum

```

```
## 23165 6152 12174
## 35396 4444 10981
## 44873 3337 10947
## 8941 4840 10870
## 45078 3706 10719
## 210 2498 10217
```

```
ex3[grep("Dmrtb1", ex3$Gene.symbol), ]
```

```
##      Row.names  A_R1 A_R2  B_R1  B_R2 P_R1 P_R2 R_R1 R_R2
## 11558 1427252_at 317.5  254 374.4 734.6 1640 1912 2508 2607
##      Gene.ID Gene.symbol  A    B    P    R    sum
## 11558   56296      Dmrtb1 285.8 554.5 1776 2558 840.2
```

```
rownames(ex3) <- ex3$Gene.ID
ex3 <- subset(ex3, select = c("Gene.symbol", "A", "B", "P", "R"))
ex3[grep("Dmrtb1", ex3$Gene.symbol), ]
```

```
##      Gene.symbol  A    B    P    R
## 56296      Dmrtb1 285.8 554.5 1776 2558
```

```
ex3[grep("Sohlh1", ex3$Gene.symbol), ]
```

```
##      Gene.symbol  A    B    P    R
## 227631      Sohlh1 453.1 366.1 73.25 83.25
```

```
# ncbifd[grep('Dmrtb1',ncbifd$Gene.symbol),] Merge D6tt with
# Griswold's data head(D6tt)
D6tt <- merge(D6tt, ex3, by.x = "entrezgene", by.y = 0, all.x = TRUE)
# sum(duplicated(D6tt$ensembl_gene_id))
# rownames(D6tt)<-D6tt$ensembl_gene_id head(D6tt) nrow(ex2)
# ex2<-ex2[!is.na(ex2$Gene.ID),] ex3<-ex2[1:nrow(ex2),]
# rownames(ex3)<-ex3$Gene.ID
```

```
D6tt[(grep("Dmrtb1", D6tt$mgi_symbol)), ]
```

```
##      entrezgene  ensembl_gene_id WT_R1 Null_R1 WT_R2 WT_R3
## 395      56296 ENSMUSG00000028610  194      14  510  254
##      Null_R2 Null_R3      mgi_id mgi_symbol chromosome_name
## 395      25      26 MGI:1927125      Dmrtb1      4
##      start_position end_position strand logFC logCPM LR
## 395      107348895  107356835  -1 -3.824  2.657 101.5
##      PValue      FDR      qvalue Gene.symbol  A    B
## 395 7.123e-24 4.05e-20 3.548e-20      Dmrtb1 285.8 554.5
##      P    R
## 395 1776 2558
```

```
D6tt[(grep("Dmrt1", D6tt$mgi_symbol)), ]
```

```
## [1] entrezgene      ensembl_gene_id WT_R1
## [4] Null_R1           WT_R2           WT_R3
## [7] Null_R2           Null_R3           mgi_id
## [10] mgi_symbol         chromosome_name start_position
## [13] end_position       strand           logFC
## [16] logCPM            LR              PValue
## [19] FDR               qvalue          Gene.symbol
## [22] A                 B               P
## [25] R
## <0 rows> (or 0-length row.names)
```

## Include Chip-Seq Data in D6tt

```
# Run on Server macs14 -t M8W_chip_dedup.bam -c
# M8W_input_dedup.bam -f BAM -s 25 \ -g 1.87e9 -p 1e-05
# --slocal 100 --llocal 1000 -n M8W_dedup_macs14_pe05 macs14
# -t DM6_chip_dedup.bam -c DM6_input_dedup.bam -f BAM -s 25
# \ -g 1.87e9 -p 1e-05 --slocal 100 --llocal 1000 -n
# DM6_dedup_macs14_pe05

# read in MACS Peaks and find overlaps with DMRT1 sites
d1p05 <- import("M8W_dedup_macs14_pe05_peaks.bed")
d6p05 <- import("DM6_dedup_macs14_pe05_peaks.bed")

# find overlaps between
mp05overlap <- findOverlaps(d6p05, d1p05)

grid.newpage()
vennplot <- draw.pairwise.venn(length(d1p05), length(d6p05),
  length(mp05overlap), c("Dmrt1", "Dmrt6"))
grid.draw(vennplot)

# Annotate d6macs peaks
d6macs <- annotatePeakInBatch(as(d6p05, "RangedData"), AnnotationData = TSS.mouse.NCBIM37,
  output = "both")
d6macs <- addGeneIDs(d6macs, "org.Mm.eg.db", c("refseq", "symbol"))

## Adding refseq ... done
## Adding symbol ... done
## prepare output ... done

d1macs <- annotatePeakInBatch(as(d1p05, "RangedData"), AnnotationData = TSS.mouse.NCBIM37,
  output = "both")
d1macs <- addGeneIDs(d1macs, "org.Mm.eg.db", c("refseq", "symbol"))

## Adding refseq ... done
## Adding symbol ... done
## prepare output ... done

# Calculate # of Unique Features in D6
length(unique(d6macs$feature))

## [1] 10363

length(d6p05)

## [1] 14862

length(unique(d1macs$feature))

## [1] 14769

# Annotate Dmrt6 TopTable with Dmrt1 & Dmrt6 Chip Occupancy
D6tt$d6macs <- D6tt$ensembl_gene_id %in% d6macs$feature
D6tt$d1macs <- D6tt$ensembl_gene_id %in% d1macs$feature
```

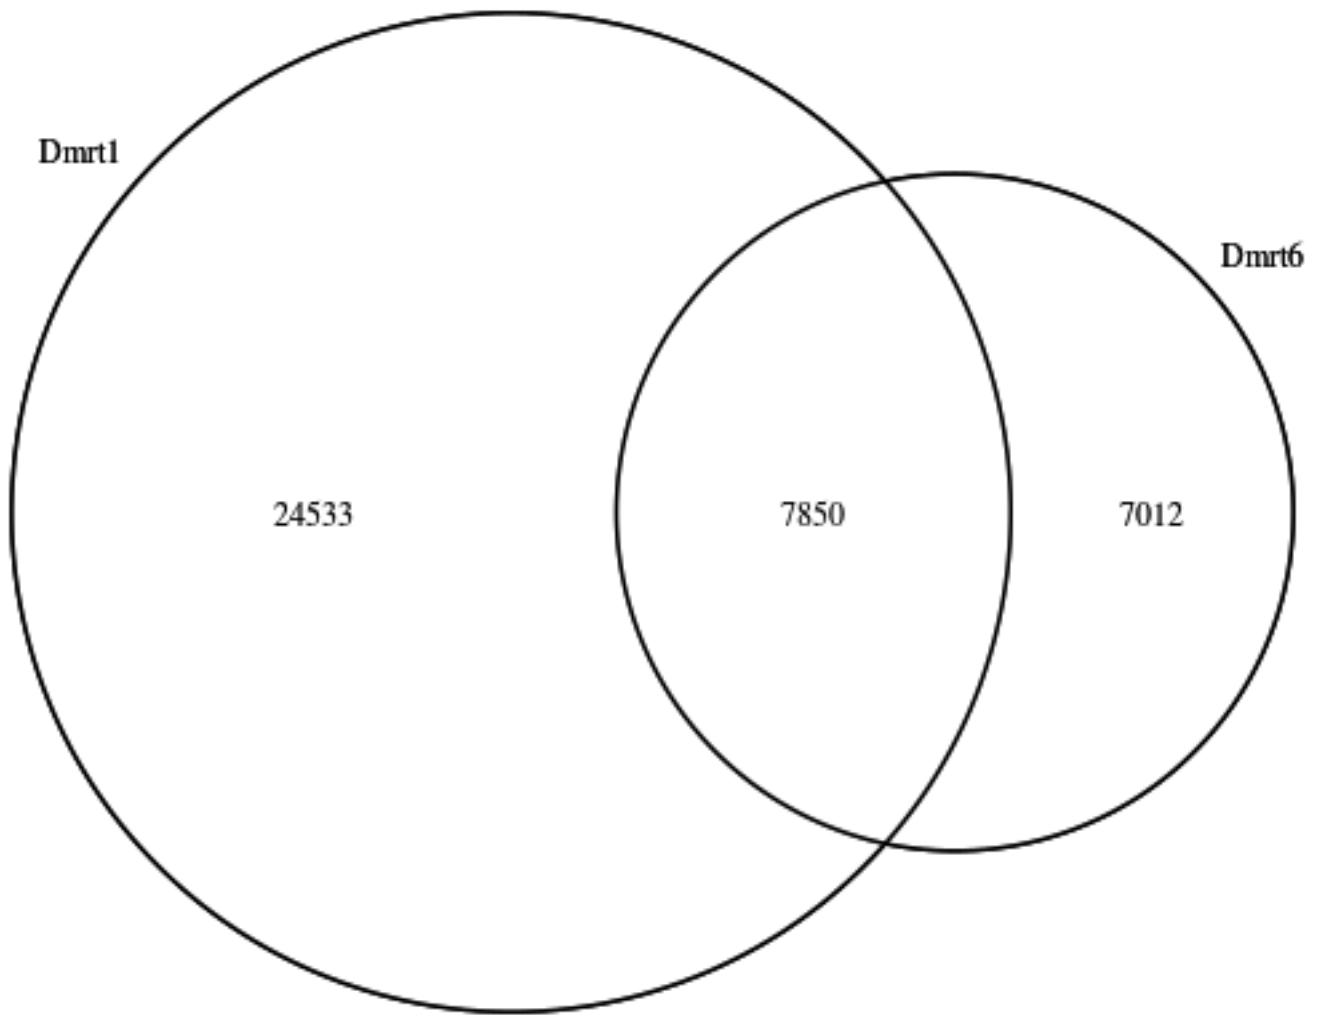

Figure 8: plot of chunk ChipSeq





```

site <- matchPWM(pwm, peak, min.score = "70%", with.score = TRUE)
# c[i]<-ifelse(length(site)>0,paste(round(elementMetadata(site)$score,4),collapse=';'),'0')
if (length(site) > 0) {
  c[i] <- max(elementMetadata(site)$score)
} else {
  c[i] <- 0
}
}
return(c)
}

```

```

# test Genomic Range on Peaks of interest
gr <- d6p05[c(1219, 8236, 8237, 7547, 8688)]
findPMinGR(gr, pwm_vitro)

```

```
## [1] 0.9316 0.0000 0.7475 0.8561 0.0000
```

```

# Find DM domain motifs in full macs peak list
d6p05DF <- as.data.frame(d6p05)
system.time(d6p05DF$maxsite <- findPMinGR(d6p05, pwm_vitro))

```

```
## user system elapsed
## 791.6 20.3 830.7
```

```

# Calculate fraction of peaks that have DM domain binding
# motifs
sum(d6p05DF$maxsite > 0.7)/nrow(d6p05DF)

```

```
## [1] 0.7391
```

```

# plot(d6p05DF$score, d6p05DF$maxsite, ylim=c(0.7,1), xlim=c(50,3500), cex=0.5,
# pch=19)

```

```

# Calculate Correlation, excluding outliers
d6p05_tempDF <- d6p05DF[d6p05DF$maxsite > 0.7 & d6p05DF$score <
2000, ]
plot(d6p05_tempDF$score, d6p05_tempDF$maxsite, cex = 0.5, pch = 19)

```

```
cor(d6p05_tempDF$score, d6p05_tempDF$maxsite)
```

```
## [1] 0.2438
```

```

# Cumulative Sum of sites as Pvalue decreases (MACS score
# increases)
d6p05_tempDF <- d6p05DF[with(d6p05DF, order(-score)), ]
plot(cumsum(d6p05_tempDF$maxsite > 0.7), cex = 0.5, pch = 19)
abline(0, sum(d6p05DF$maxsite > 0.7)/nrow(d6p05DF), col = "red")

```

Count reads for Adult DMRT1 and DMRT6 ChipSeq data.

```

bamlst <- BamFileList(list.files("/mnt/afp/murphy/data/mm9",
pattern = glob2rx("M8W*_dedup.bam"), full = TRUE))
d1counts <- summarizeOverlaps(d6p05, bamlst, mode = "Union",

```

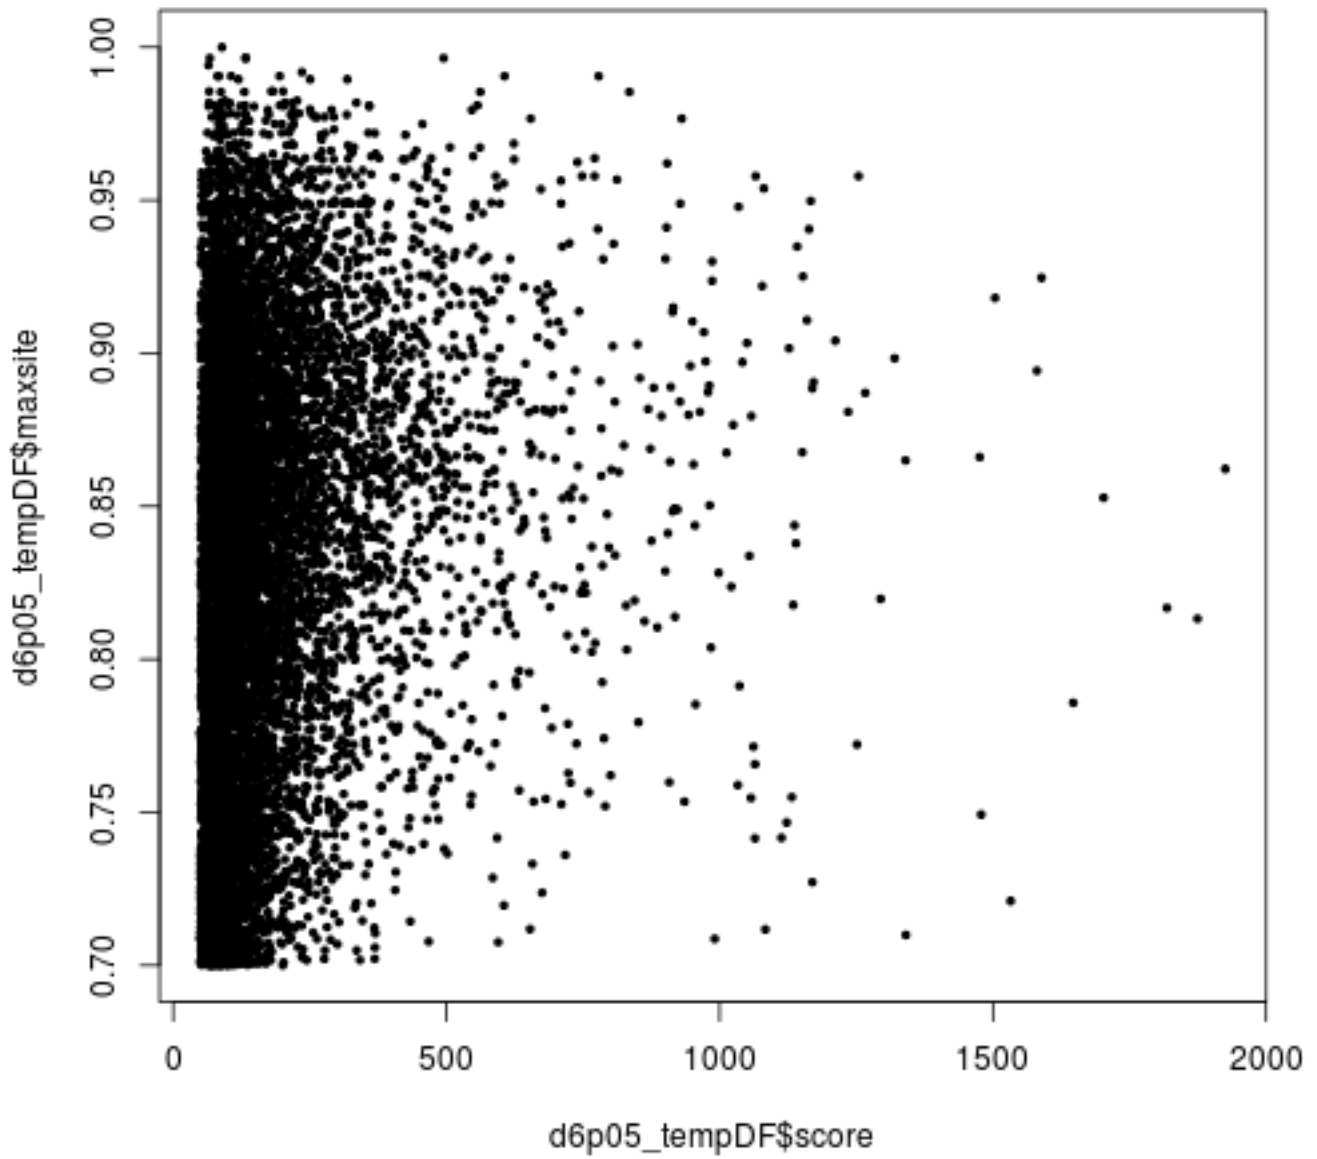

Figure 10: plot of chunk in Vitro Pwm Search

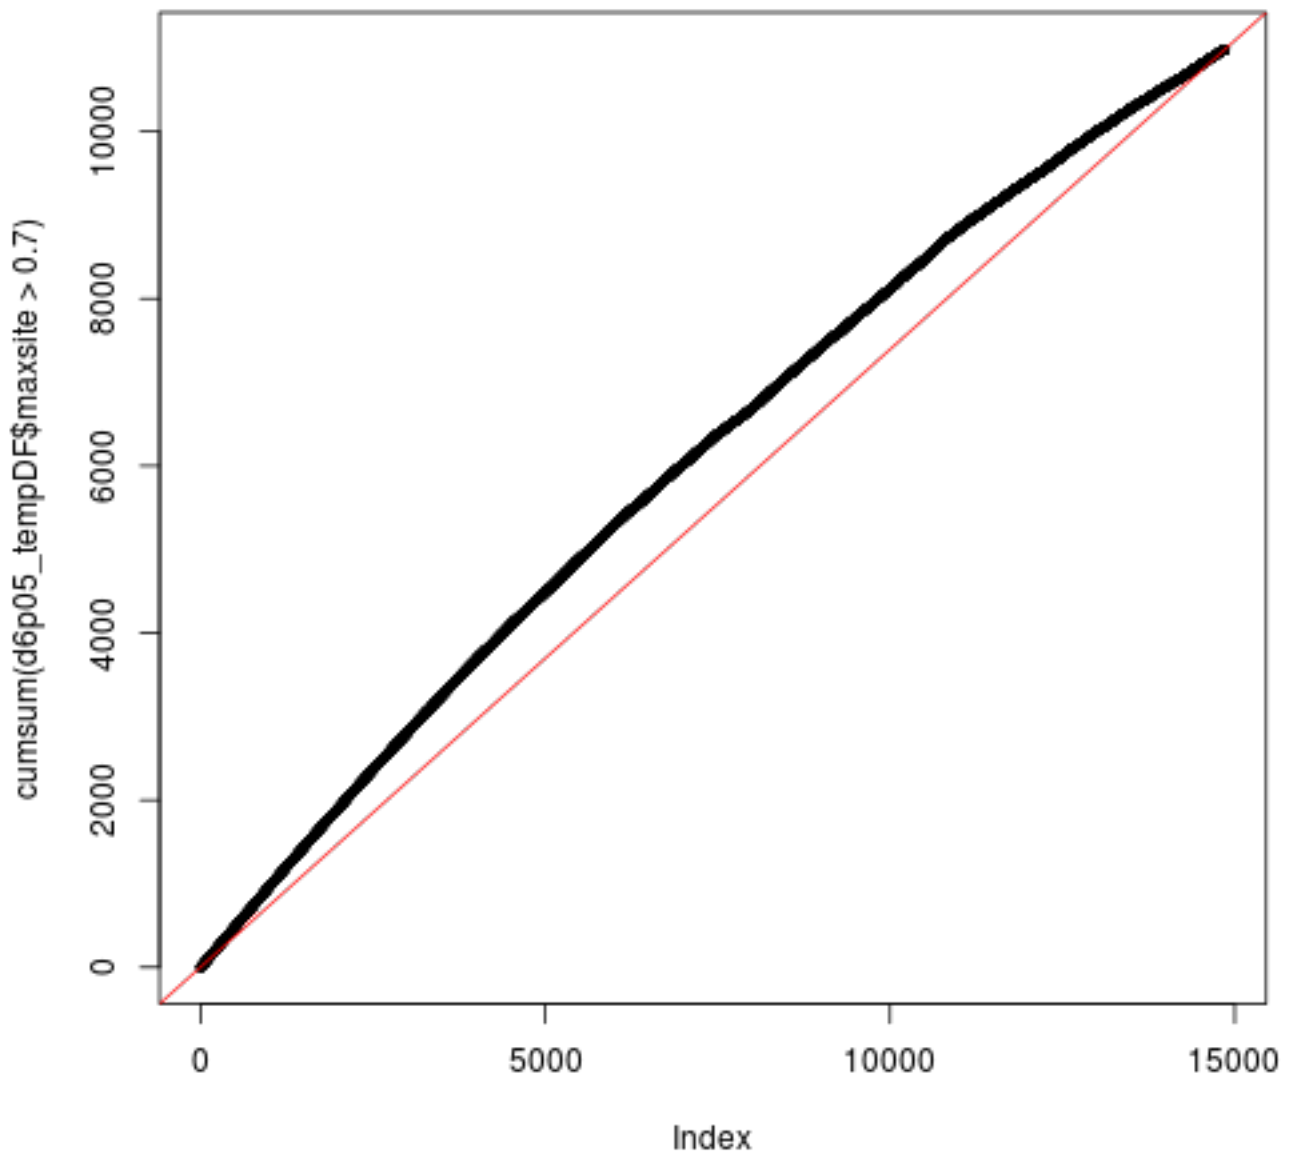

Figure 11: plot of chunk inVtroPwmSearch

```

    singleEnd = TRUE, ignore.strand = TRUE)
d1countsDF <- as.data.frame(assays(d1counts)$counts)

```

```

bamlst <- BamFileList(list.files("/mnt/afp/murphy/data/mm9",
    pattern = glob2rx("DM6*_dedup#.bam"), full = TRUE))
d6counts <- summarizeOverlaps(d6p05, bamlst, mode = "Union",
    singleEnd = TRUE, ignore.strand = TRUE)
d6countsDF <- as.data.frame(assays(d6counts)$counts)
save(d1countsDF, d6countsDF, file = "chip_count_p05.rdata")

```

Analyze ChIP counts to identify Dmrt6 Specific Binding sites.

```
load("chip_count_p05.rdata")
```

```

# Normalize to Counts within regions of interest
colnames(d1countsDF) <- c("d1c", "d1i")

```

```

# normalize to total counts in genomic intervals
d1Enrichment <- log2(10^6 * d1countsDF[, 1]/sum(d1countsDF[,
    1]))

```

```

colnames(d6countsDF) <- c("d6c", "d6i")
d6Enrichment <- log2(10^6 * d6countsDF[, 1]/sum(d6countsDF[,
    1]))

```

```

# define logical variable to loosely define 'dmrt6 specific
# Peaks'
subset = d6Enrichment/d1Enrichment > 1.25

```

```

plot(d1Enrichment, d6Enrichment, ylim = c(4, 14), pch = 19, cex = 0.5,
    col = ifelse(subset, "red", "black"))

```

```

# calculate correlation coefficient for DMRT6 an DMRT1
# binding intensity
cor(d6Enrichment, d1Enrichment, method = "spearman")

```

```
## [1] 0.6424
```

```

# Output a Table sum(d6Enrichment/d1Enrichment > 1.25)

```

```

d6p05DF$d6cpm <- d6countsDF[, "d6c"]
d6p05DF$d1cpm <- d1countsDF[, "d1c"]
d6p05DF$d6Enrichment <- d6Enrichment
d6p05DF$d1Enrichment <- d1Enrichment
d6p05DF$ratio <- d6Enrichment/d1Enrichment

```

```

d6macsDF <- as.data.frame(d6macs)
d6macsDF$peak <- as.integer(d6macsDF$peak)
d6macsDF <- d6macsDF[, c("peak", "feature", "symbol", "insideFeature")]

```

```

d6out <- merge(d6p05DF, d6macsDF, by.x = 0, by.y = "peak", all = T)
d6out$row <- as.integer(d6out$Row.names)
d6out <- d6out[with(d6out, order(row)), ]
d6out <- d6out[, c("feature", "symbol", "seqnames", "start",
    "end", "width", "score", "maxsite", "name", "d6cpm", "d1cpm",
    "d6Enrichment", "d1Enrichment", "ratio")]

```

```

d6out <- d6out[with(d6out, order(-score)), ]
# head(d6out) d6out[grep('Kat6a', d6out$symbol), ]
write.csv(d6out, file = "/mnt/afp/teng/data/Supplementary_Table_3.csv",
    quote = F, row.names = F)

```

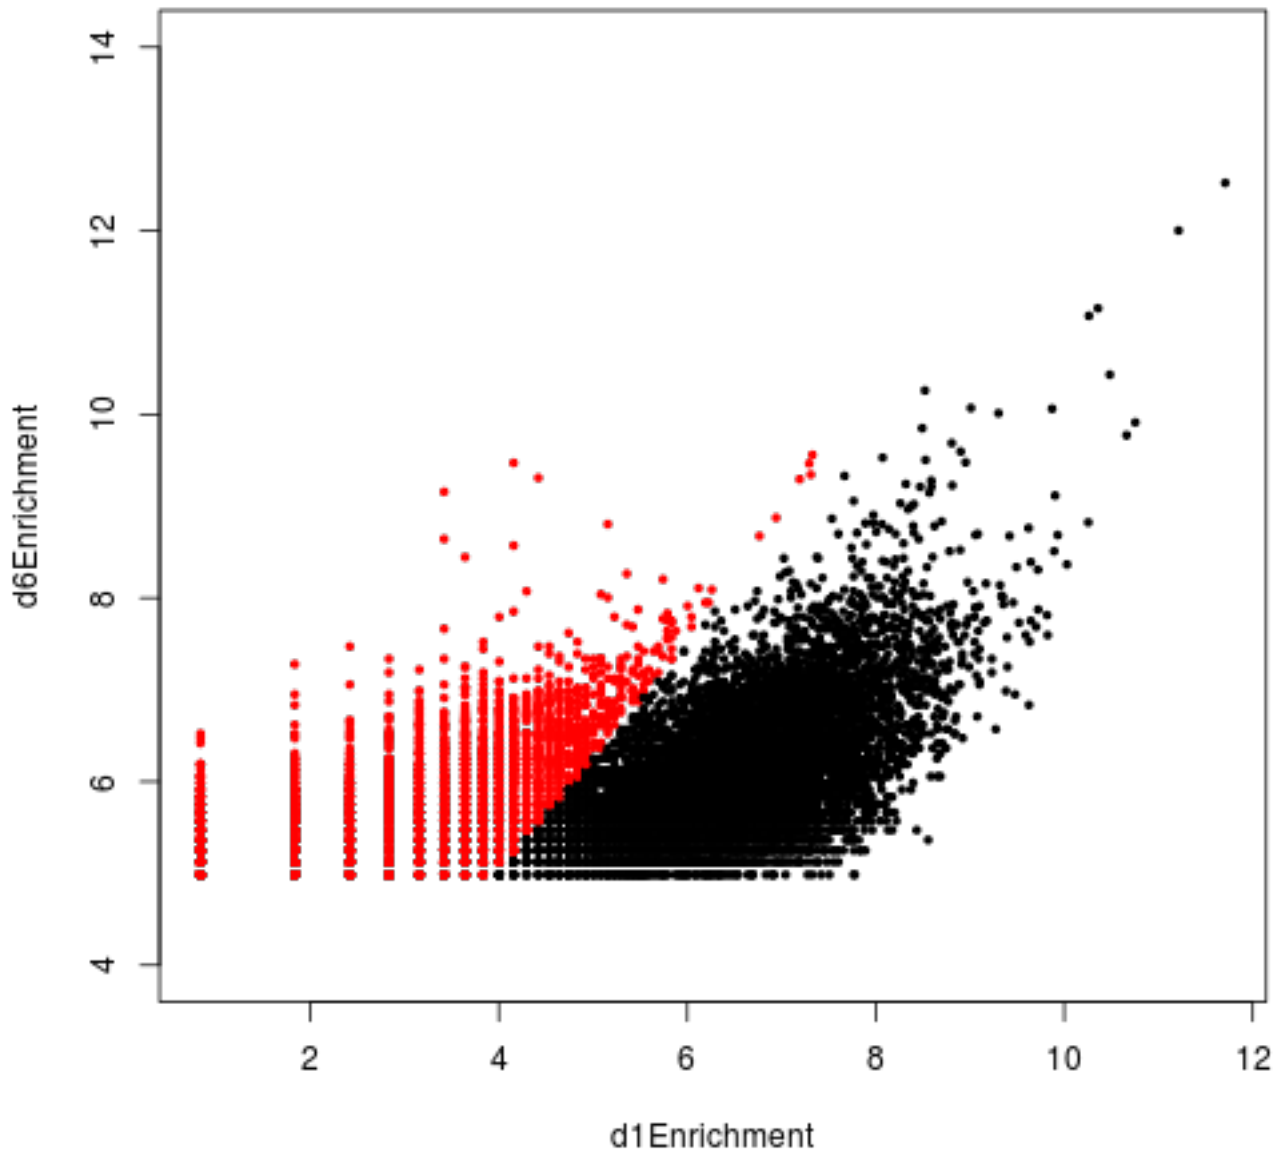

Figure 12: plot of chunk analyzeChipSeqCounts

Quick check for Enriched GO Terms in DMRT6 Specific Peaks

```
# universe<-keys(org.Mm.eg.db, 'SYMBOL')
univ1 <- unique(as.character(na.omit(d1macs$symbol)))
univ6 <- unique(as.character(na.omit(d6macs$symbol)))
universe <- unique(c(univ1, univ6))
length(universe)

## [1] 12171

selected <- unique(as.character(na.omit(d6macs[subset, ]$symbol)))
length(selected)

## [1] 4120

univmap <- select(org.Mm.eg.db, universe, "ENTREZID", "SYMBOL")
genemap <- select(org.Mm.eg.db, selected, "ENTREZID", "SYMBOL")
param <- new("GOHyperGParams", geneIds = genemap, universeGeneIds = univmap,
  annotation = "org.Mm.eg.db", ontology = "BP", pvalueCutoff = 0.01,
  conditional = FALSE, testDirection = "over")

## Warning: converting geneIds from list to atomic vector via unlist
## Warning: removing duplicate IDs in geneIds
## Warning: converting univ from list to atomic vector via unlist
## Warning: removing duplicate IDs in universeGeneIds

hyp <- hyperGTest(param)
tt <- head(summary(hyp), 20)
tt

##      GOBPID      Pvalue OddsRatio ExpCount Count Size
## 1  GO:0031323 4.069e-11    1.330   1054.9  1203 3118
## 2  GO:0050794 2.877e-09    1.259   1794.8  1943 5305
## 3  GO:0080090 3.476e-09    1.293   1026.1  1157 3033
## 4  GO:0060255 5.704e-09    1.294    970.3  1097 2868
## 5  GO:0044260 6.488e-09    1.262   1393.6  1533 4119
## 6  GO:0048519 1.365e-08    1.309    792.0   907 2341
## 7  GO:0019222 1.577e-08    1.266   1173.0  1303 3467
## 8  GO:0051252 1.765e-08    1.327    674.6   782 1994
## 9  GO:0019219 1.825e-08    1.302    813.0   928 2403
## 10 GO:0010468 2.082e-08    1.303    800.1   914 2365
## 11 GO:0051171 2.143e-08    1.299    822.1   937 2430
## 12 GO:0009653 2.613e-08    1.373    492.6   586 1456
## 13 GO:0006355 3.429e-08    1.324    652.3   756 1928
## 14 GO:2001141 3.750e-08    1.322    656.3   760 1940
## 15 GO:0048523 4.384e-08    1.308    718.3   825 2123
## 16 GO:0016070 6.149e-08    1.292    790.7   900 2337
## 17 GO:0032774 6.955e-08    1.313    663.1   765 1960
## 18 GO:0006351 7.487e-08    1.314    657.7   759 1944
## 19 GO:0050789 9.404e-08    1.229   1901.0  2034 5619
## 20 GO:2000112 1.484e-07    1.294    715.9   818 2116
##
##                                     Term
## 1                regulation of cellular metabolic process
## 2                regulation of cellular process
## 3                regulation of primary metabolic process
## 4                regulation of macromolecule metabolic process
```

```

## 5          cellular macromolecule metabolic process
## 6          negative regulation of biological process
## 7          regulation of metabolic process
## 8          regulation of RNA metabolic process
## 9  regulation of nucleobase-containing compound metabolic process
## 10         regulation of gene expression
## 11         regulation of nitrogen compound metabolic process
## 12         anatomical structure morphogenesis
## 13         regulation of transcription, DNA-templated
## 14         regulation of RNA biosynthetic process
## 15         negative regulation of cellular process
## 16         RNA metabolic process
## 17         RNA biosynthetic process
## 18         transcription, DNA-templated
## 19         regulation of biological process
## 20         regulation of cellular macromolecule biosynthetic process

```

```

# barplot(-log10(tt$Pvalue), names.arg=paste(tt$Term,
# tt$GOBPID), las=2, ylab='-log10 p-value', col='Red')

```

```

# try another test for all DMRT6 peaks

```

```

selected <- univ6
genemap <- select(org.Mm.eg.db, selected, "ENTREZID", "SYMBOL")
param <- new("GOHyperGParams", geneIds = genemap, universeGeneIds = univmap,
  annotation = "org.Mm.eg.db", ontology = "BP", pvalueCutoff = 0.01,
  conditional = FALSE, testDirection = "over")

```

```

## Warning: converting geneIds from list to atomic vector via unlist
## Warning: removing duplicate IDs in geneIds
## Warning: converting univ from list to atomic vector via unlist
## Warning: removing duplicate IDs in universeGeneIds

```

```

hyp <- hyperGTest(param)
tt <- head(summary(hyp), 20)
tt

```

| ##    | GOBPID     | Pvalue    | OddsRatio | ExpCount | Count | Size |
|-------|------------|-----------|-----------|----------|-------|------|
| ## 1  | GO:0044260 | 1.896e-15 | 1.383     | 2662     | 2855  | 4119 |
| ## 2  | GO:0031323 | 1.296e-12 | 1.368     | 2015     | 2174  | 3118 |
| ## 3  | GO:0043170 | 2.645e-12 | 1.320     | 2940     | 3113  | 4549 |
| ## 4  | GO:0060255 | 1.232e-11 | 1.360     | 1854     | 2001  | 2868 |
| ## 5  | GO:0006139 | 2.205e-11 | 1.334     | 2150     | 2303  | 3327 |
| ## 6  | GO:0016070 | 3.602e-11 | 1.383     | 1510     | 1644  | 2337 |
| ## 7  | GO:0044237 | 6.671e-11 | 1.286     | 3567     | 3732  | 5519 |
| ## 8  | GO:0019222 | 1.023e-10 | 1.316     | 2241     | 2390  | 3467 |
| ## 9  | GO:0080090 | 1.530e-10 | 1.328     | 1960     | 2102  | 3033 |
| ## 10 | GO:0010467 | 2.218e-10 | 1.319     | 2044     | 2186  | 3162 |
| ## 11 | GO:0046483 | 2.447e-10 | 1.310     | 2201     | 2346  | 3405 |
| ## 12 | GO:0034645 | 2.468e-10 | 1.352     | 1611     | 1742  | 2493 |
| ## 13 | GO:0034641 | 3.892e-10 | 1.303     | 2252     | 2397  | 3485 |
| ## 14 | GO:0010468 | 4.208e-10 | 1.354     | 1528     | 1655  | 2365 |
| ## 15 | GO:0006725 | 6.894e-10 | 1.300     | 2216     | 2358  | 3429 |
| ## 16 | GO:0090304 | 7.546e-10 | 1.331     | 1708     | 1838  | 2643 |
| ## 17 | GO:0051171 | 1.145e-09 | 1.339     | 1570     | 1695  | 2430 |
| ## 18 | GO:0006807 | 1.501e-09 | 1.285     | 2386     | 2528  | 3692 |
| ## 19 | GO:0019219 | 2.094e-09 | 1.334     | 1553     | 1675  | 2403 |
| ## 20 | GO:0009059 | 2.117e-09 | 1.325     | 1653     | 1778  | 2558 |

```

##
## 1          cellular macromolecule metabolic process

```



```

## 2             regulation of cellular metabolic process
## 3             macromolecule metabolic process
## 4             regulation of macromolecule metabolic process
## 5             nucleobase-containing compound metabolic process
## 6             RNA metabolic process
## 7             cellular metabolic process
## 8             regulation of metabolic process
## 9             regulation of primary metabolic process
## 10            gene expression
## 11            heterocycle metabolic process
## 12            cellular macromolecule biosynthetic process
## 13            cellular nitrogen compound metabolic process
## 14            regulation of gene expression
## 15            cellular aromatic compound metabolic process
## 16            nucleic acid metabolic process
## 17            regulation of nitrogen compound metabolic process
## 18            nitrogen compound metabolic process
## 19 regulation of nucleobase-containing compound metabolic process
## 20            macromolecule biosynthetic process

```

```

# barplot(-log10(ttPvalue), names.arg=paste(ttTerm,
# ttGOBPID), las=2, ylab='-log10 p-value', col='Red')

```

Check to see if there is a DMRT binding site under the DMRT6 Specific Peaks

```

# Use a Chi-Squared test to see how unlikely the distribution
# of sites is
d6ySy <- sum(d6p05DF[subset, "maxsite"] > 0.7)
d6ySn <- sum(subset) - d6ySy
d6nSy <- sum(d6p05DF$maxsite > 0.7) - d6ySy
d6nSn <- nrow(d6p05DF) - d6nSy - d6ySn - d6ySy
contable <- matrix(c(d6ySy, d6nSy, d6ySn, d6nSn), nr = 2, nc = 2)
contable

```

```

##      [,1] [,2]
## [1,] 2770 3235
## [2,] 8215  642

```

```

chisq.test(contable)

```

```

##
## Pearson's Chi-squared test with Yates' continuity
## correction
##
## data:  contable
## X-squared = 4032, df = 1, p-value < 2.2e-16

```

```

# Compare In Vivo defined DMRT6 site with In vitro Site
d6summits <- read.table("DM6_dedup_mac14_pe05_summits.bed",
  skip = 0)

```

```

# Make 50bp windows around the summit
d6summits <- RangedData(space = d6summits[, 1], IRanges(start = d6summits[,
  2] - 25, end = d6summits[, 3] + 25), strand = "*")

```

```

# look for motifs under strong Dmrt6 peaks
sum(d6p05DF$score > 250)

```

```

## [1] 1724

system.time(d6motifs <- GADEM(d6summits[d6p05DF$score > 250,
], genome = Mmusculus, weightType = 1, maskR = 1))

##      user      system elapsed
## 1380.322    2.744    361.488

length(d6motifs@motifList)

## [1] 5

consensus(d6motifs)

## [1] "GmTACwTTGTakC" "nGGGGGrGGGn" "GmwACwGTwrCAr"
## [4] "nrGCwGCTGn"    "TkGCTACAn"

dmrt6.pwm <- getPWM(d6motifs)
pfm.dmrt6 <- new("pfm", mat = dmrt6.pwm[[1]], name = "Dmrt6 Chip-Seq 2014")

plotMotifLogoStack(DNAMotifAlignment(c(pfm.vitro, pfm.dmrt6)))

# look for motifs in DMRT6 peaks that do not have an In vitro
# site sum(d6p05DF$maxsite==0 & d6p05DF$score > 100)
system.time(novel_motifs <- GADEM(d6summits[d6p05DF$maxsite ==
0 & d6p05DF$score > 100, ], genome = Mmusculus, weightType = 1,
maskR = 1))

##      user      system elapsed
## 444.928    3.112    118.050

length(novel_motifs@motifList)

## [1] 2

consensus(novel_motifs)

## [1] "rnsrGrrrrrGGGrGGGGGGGGGrGGGrrrrr"
## [2] "yTGyTrCTGTTGCwGy"

novel.pwm <- getPWM(novel_motifs)
novel1.pfm <- new("pfm", mat = novel.pwm[[1]], name = "Novel Site 1")
plotMotifLogo(novel1.pfm)

novel2.pfm <- new("pfm", mat = novel.pwm[[2]], name = "Novel Site 2")
plotMotifLogo(novel2.pfm)

```

Use Ingenuity's Ontology Categories to highlight spermatogenesis genes.

```

# read in ingenuity csv's
fls <- list.files("/mnt/afp/micah/From Vivian to Micah/csv/",
pattern = "csv$", full = TRUE)
rm(humanEntrez)

```

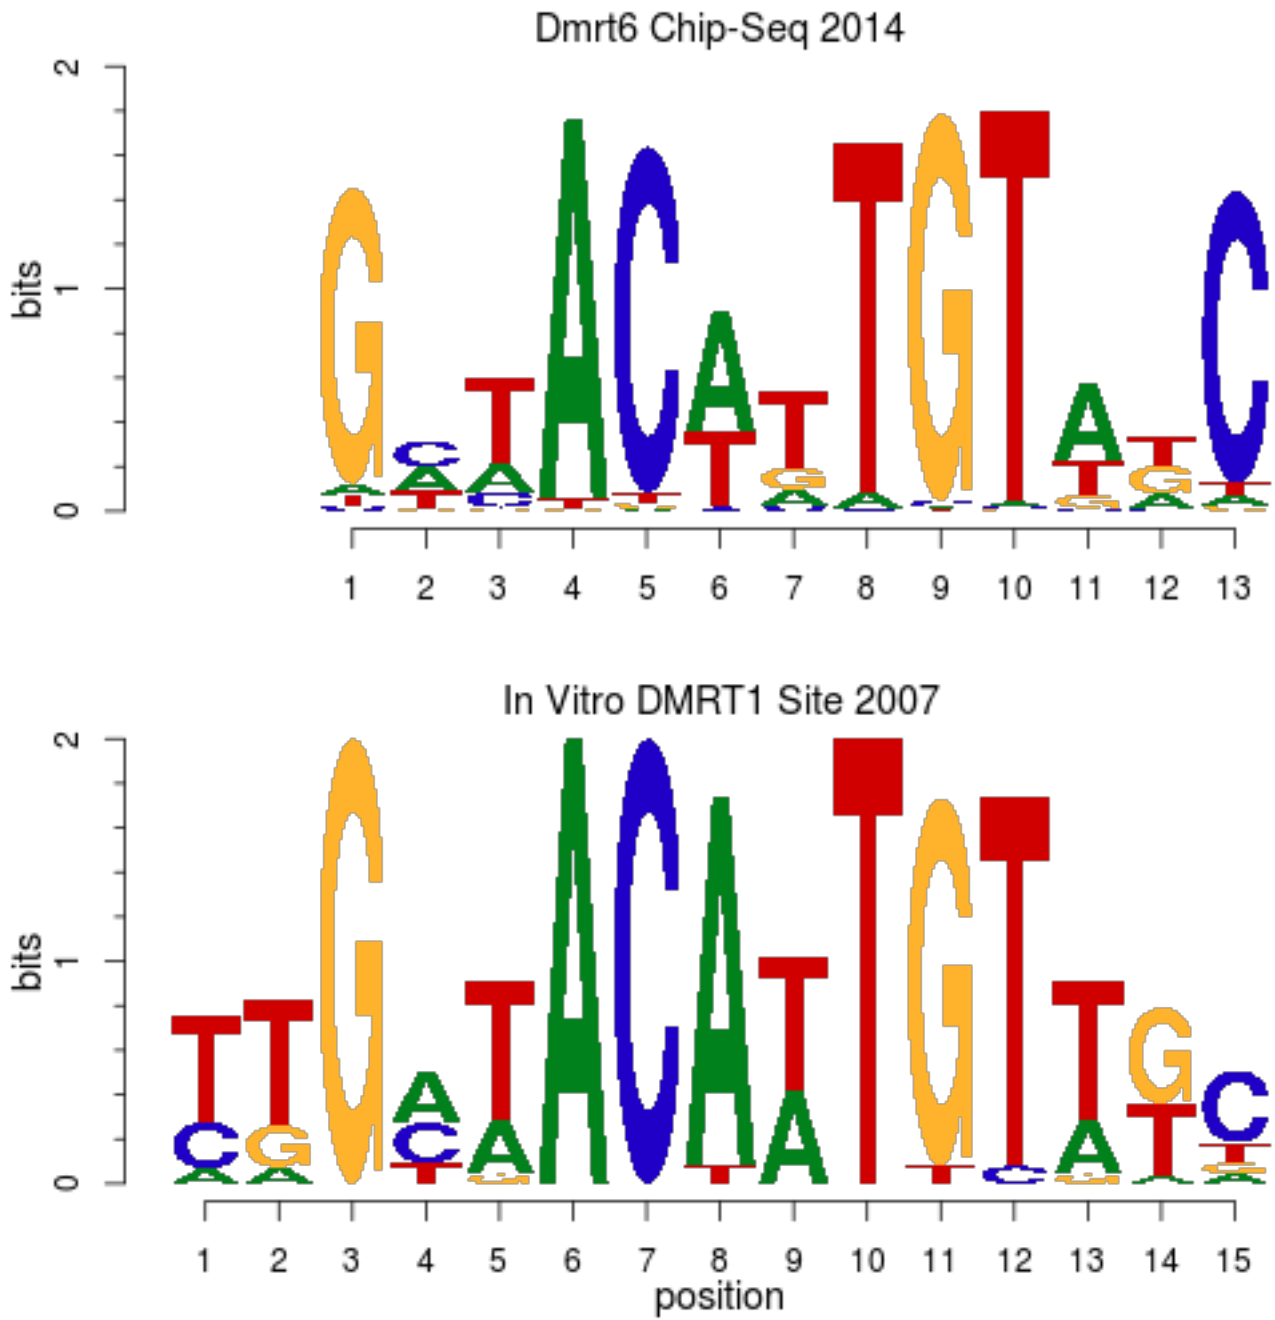

Figure 13: plot of chunk MotifAnalysis

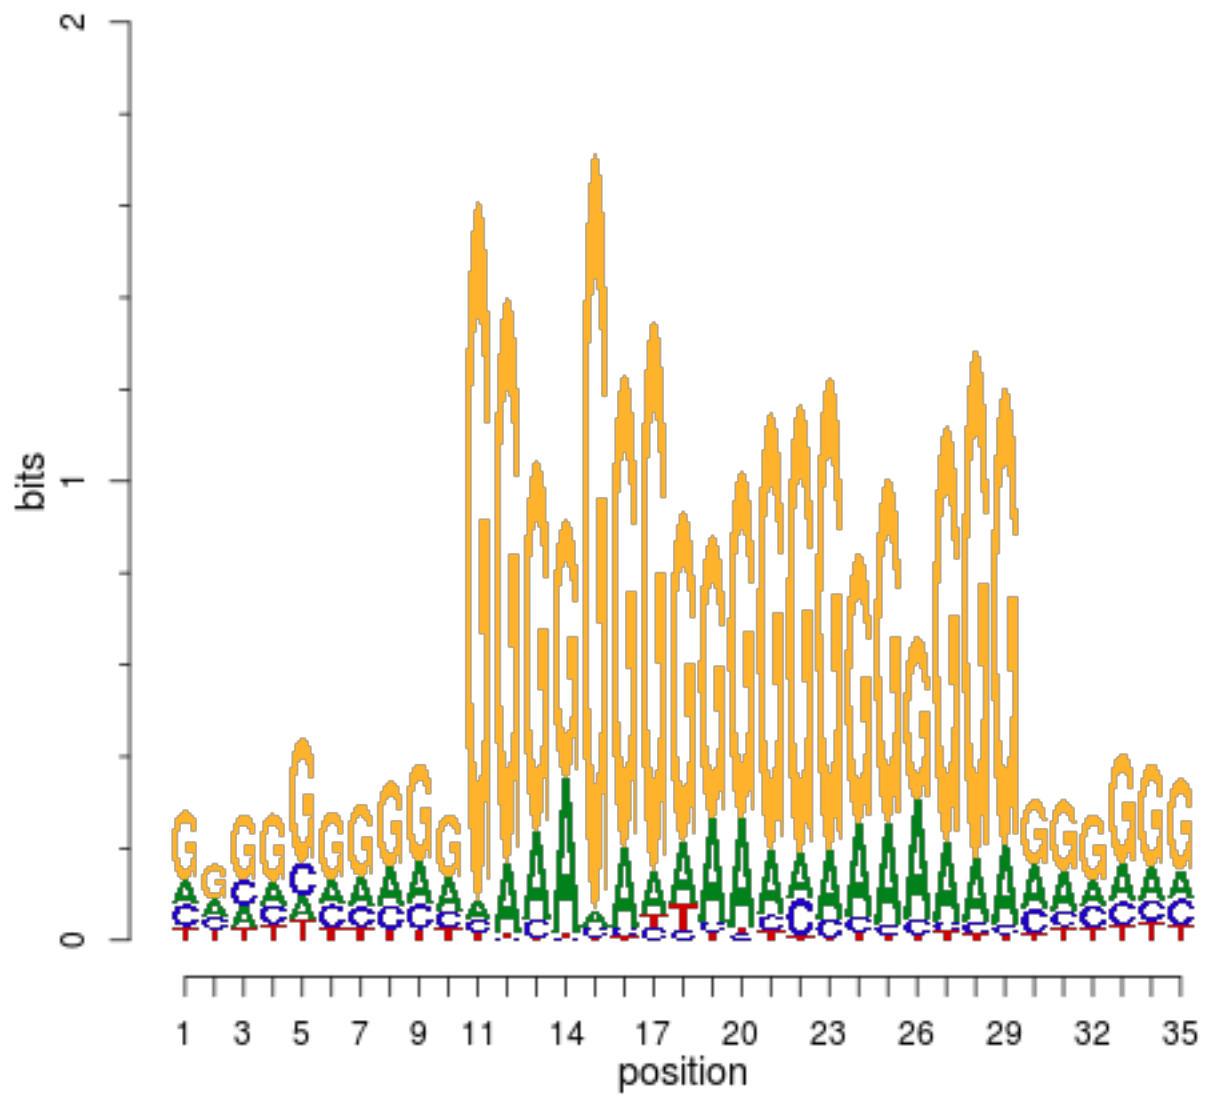

Figure 14: plot of chunk MotifAnalysis

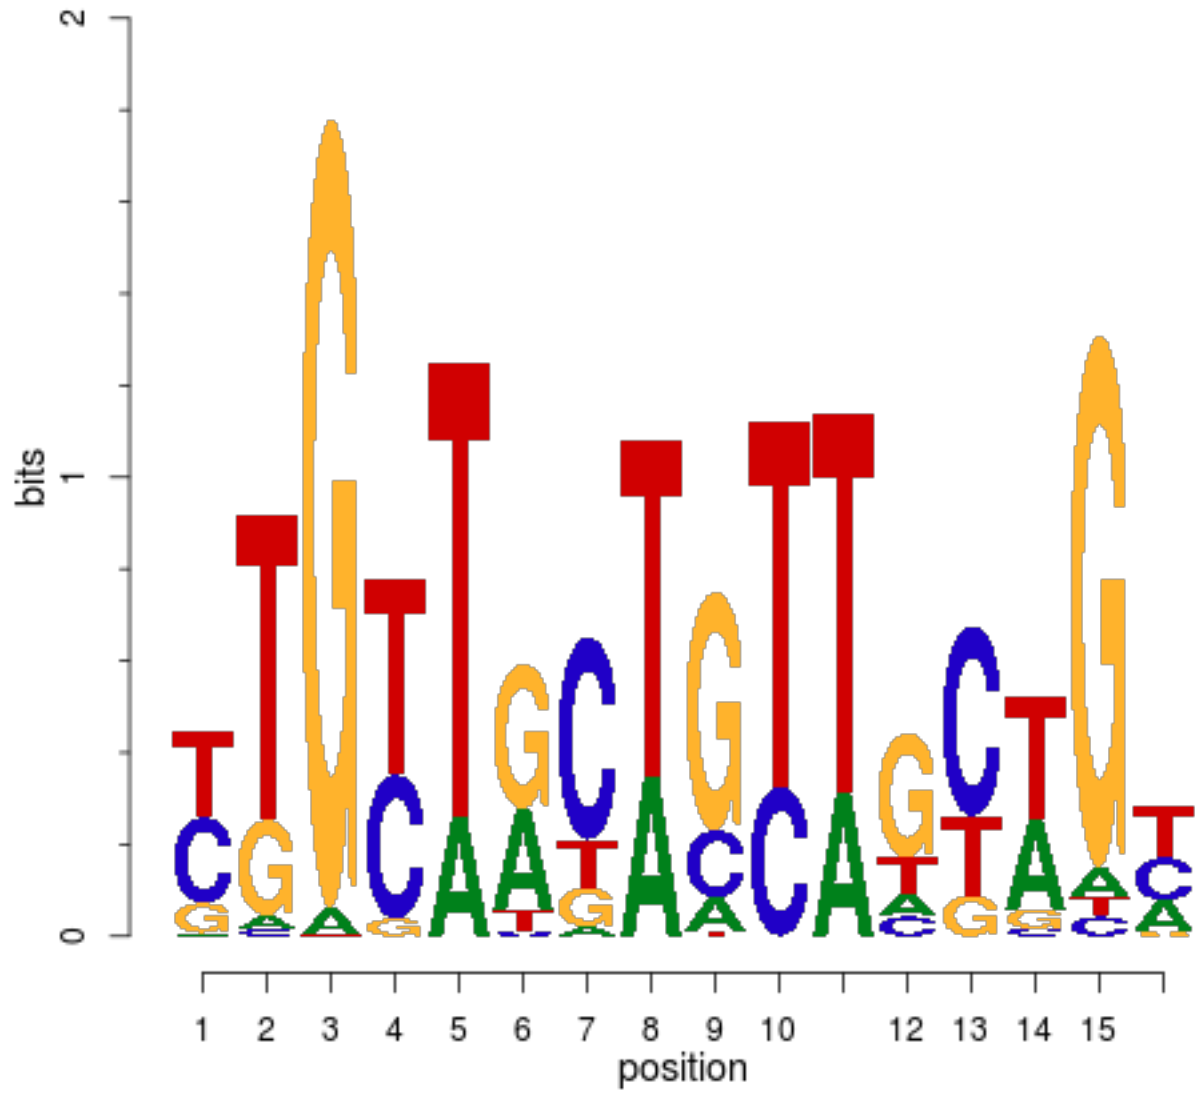

Figure 15: plot of chunk MotifAnalysis

```

## Warning: object 'humanEntrez' not found

rm(mouseEntrez)

## Warning: object 'mouseEntrez' not found

humanEntrez = list()
mouseEntrez = list()
for (i in 1:length(fls)) {
  print(fls[i])
  temp <- read.csv(fls[i], skip = 1, header = T, stringsAsFactors = F)
  human <- temp$Entrez.Gene.ID.for.Human
  human <- human[!is.na(human)]
  human <- unlist(strsplit(as.character(human), "\\|"))
  mouse <- temp$Entrez.Gene.ID.for.Mouse
  mouse <- mouse[!is.na(mouse)]
  mouse <- unlist(strsplit(as.character(mouse), "\\|"))
  humanEntrez[[i]] <- human
  mouseEntrez[[i]] <- mouse
}

## [1] "/mnt/afp/micah/From Vivian to Micah/csv//genes without mouse entrez.csv"
## [1] "/mnt/afp/micah/From Vivian to Micah/csv//ingenuity2 dev of genital organ.csv"
## [1] "/mnt/afp/micah/From Vivian to Micah/csv//ingenuity2 gamet.csv"
## [1] "/mnt/afp/micah/From Vivian to Micah/csv//ingenuity2 germ cell.csv"
## [1] "/mnt/afp/micah/From Vivian to Micah/csv//ingenuity2 gonad.csv"
## [1] "/mnt/afp/micah/From Vivian to Micah/csv//ingenuity2 meiosis.csv"
## [1] "/mnt/afp/micah/From Vivian to Micah/csv//ingenuity2 semiferous.csv"
## [1] "/mnt/afp/micah/From Vivian to Micah/csv//ingenuity2 seminal.csv"
## [1] "/mnt/afp/micah/From Vivian to Micah/csv//ingenuity2 sperm.csv"
## [1] "/mnt/afp/micah/From Vivian to Micah/csv//ingenuity2 testis.csv"

names(humanEntrez) <- c("misc", "dev", "gamet", "germ", "gonad",
  "meiosis", "seminiferous", "seminal", "sperm", "testis")
names(mouseEntrez) <- c("misc", "dev", "gamet", "germ", "gonad",
  "meiosis", "seminiferous", "seminal", "sperm", "testis")

# Add Columns to master tt table names(humanEntrez)
for (i in 1:length(humanEntrez)) {
  print(names(humanEntrez)[i])
  oldcolnames <- colnames(D6tt)
  temp <- D6tt$ensembl_gene_id %in% humanEntrezToMouseEnsemble(humanEntrez[[i]])[,
    2] | D6tt$entrezgene %in% mouseEntrez[[i]]
  D6tt <- cbind(D6tt, temp)
  colnames(D6tt) <- c(oldcolnames, names(humanEntrez[i]))
}

## [1] "misc"
## [1] "dev"
## [1] "gamet"
## [1] "germ"
## [1] "gonad"
## [1] "meiosis"
## [1] "seminiferous"
## [1] "seminal"
## [1] "sperm"
## [1] "testis"

```

Make a table of “Genes of Interest” to validate by QPCR.

```

# Create some Logical variables (decider1-3) to indicate
# whether the gene is 'interesting' Decider1 tells us that it
# is one of the ingenuity categories
decider1 <- D6tt$misc | D6tt$dev | D6tt$gamet | D6tt$germ | D6tt$gonad |
  D6tt$meiosis | D6tt$seminiferous | D6tt$seminal | D6tt$sperm |
  D6tt$testis
sum(decider1)

## [1] 122

# decider2 is just the p-value (may be redundant with GLM
# section above)
decider2 <- D6tt$PValue < 0.05
sum(decider2)

## [1] 1595

# decider2 <- D6tt$'PValue' <0.05 & !is.na(D6tt$entrezgene)

# We want to only consider genes that are expressed in A's
# and B's or have unknown expression because they weren't on
# the microarray
decider3 <- D6tt$A > 100 | D6tt$B > 100
decider3[is.na(decider3)] <- TRUE
sum(decider3)

## [1] 903

# D6tt[D6tt$directTarget & D6tt$germIPA & D6tt$'PValue'
# <0.05,]
D6ttGOI <- D6tt[decider1 & decider2 & decider3, ]
nrow(D6ttGOI)

## [1] 58

# run pubmedBatchQuery on interesting genes
D6ttGOI <- cbind(D6ttGOI, pubmedBatchQuery(D6ttGOI$mgi_symbol,
  "Testis"))

D6ttGOI <- D6ttGOI[with(D6ttGOI, order(PValue)), ]
# temp[,c('mgi_symbol', 'mgi_id', 'logFC', 'PValue', 'A', 'B', 'P', 'R', 'PubMed')]

```

Output the results

```

D6tt <- D6tt[with(D6tt, order(-logFC)), ]
D6tt[grep("Dmrtb1", D6tt$mgi_symbol), ]

##      entrezgene      ensembl_gene_id WT_R1 Null_R1 WT_R2 WT_R3
## 395      56296 ENSMUSG00000028610  194      14  510  254
##      Null_R2 Null_R3      mgi_id mgi_symbol chromosome_name
## 395      25      26 MGI:1927125      Dmrtb1              4
##      start_position end_position strand  logFC logCPM  LR
## 395      107348895  107356835      -1 -3.824  2.657 101.5
##      PValue      FDR      qvalue Gene.symbol      A      B

```

```

## 395 7.123e-24 4.05e-20 3.548e-20      Dmrtb1 285.8 554.5
##      P      R d6macs d1macs misc      dev gamet  germ gonad
## 395 1776 2558      TRUE      TRUE FALSE FALSE FALSE FALSE
##      meiosis seminiferous seminal sperm testis
## 395      FALSE      FALSE      FALSE FALSE      FALSE

write.table(D6tt, "/mnt/afp/teng/data/Supplementary_Table_1.csv",
            quote = F, row.names = F, sep = ",")
write.table(D6ttGOI, "/mnt/afp/teng/data/Supplementary_Table_2.csv",
            quote = F, row.names = F, sep = ",")
sessionInfo()

## R version 3.1.0 (2014-04-10)
## Platform: x86_64-pc-linux-gnu (64-bit)
##
## locale:
## [1] LC_CTYPE=en_US.UTF-8 LC_NUMERIC=C
## [3] LC_TIME=C             LC_COLLATE=C
## [5] LC_MONETARY=C         LC_MESSAGES=C
## [7] LC_PAPER=C           LC_NAME=C
## [9] LC_ADDRESS=C         LC_TELEPHONE=C
## [11] LC_MEASUREMENT=C     LC_IDENTIFICATION=C
##
## attached base packages:
## [1] grid      parallel stats      graphics grDevices
## [6] utils     datasets methods     base
##
## other attached packages:
## [1] motifStack_1.8.0
## [2] ade4_1.6-2
## [3] MotIV_1.20.0
## [4] grImport_0.9-0
## [5] rGADEM_2.12.0
## [6] seqLogo_1.30.0
## [7] BSgenome.Mmusculus.UCSC.mm9_1.3.99
## [8] GOstats_2.30.0
## [9] graph_1.42.0
## [10] Category_2.30.0
## [11] GO.db_2.14.0
## [12] Matrix_1.1-3
## [13] org.Mm.eg.db_2.14.0
## [14] ChIPpeakAnno_2.12.1
## [15] RSQlite_0.11.4
## [16] DBI_0.2-7
## [17] VennDiagram_1.6.5
## [18] rtracklayer_1.24.0
## [19] GEOquery_2.30.0
## [20] XML_3.98-1.1
## [21] biomaRt_2.20.0
## [22] qvalue_1.38.0
## [23] edgeR_3.6.1
## [24] limma_3.20.1
## [25] GenomicAlignments_1.0.1
## [26] BSgenome_1.32.0
## [27] GenomicFeatures_1.16.0
## [28] AnnotationDbi_1.26.0
## [29] Biobase_2.24.0
## [30] Rsamtools_1.16.0
## [31] Biostrings_2.32.0
## [32] XVector_0.4.0

```



```
## [33] GenomicRanges_1.16.3
## [34] GenomeInfoDb_1.0.2
## [35] IRanges_1.22.6
## [36] BiocGenerics_0.10.0
## [37] knitr_1.5
##
## loaded via a namespace (and not attached):
## [1] AnnotationForge_1.6.1 BBmisc_1.6
## [3] BatchJobs_1.2         BiocParallel_0.6.0
## [5] GSEABase_1.26.0      MASS_7.3-33
## [7] RBGL_1.40.0          RCurl_1.95-4.1
## [9] Rcpp_0.11.1          annotate_1.42.0
## [11] bitops_1.0-6         brew_1.0-6
## [13] codetools_0.2-8      digest_0.6.4
## [15] evaluate_0.5.5       fail_1.2
## [17] foreach_1.4.2        formatR_0.10
## [19] genefilter_1.46.0    iterators_1.0.7
## [21] lattice_0.20-29      multtest_2.20.0
## [23] plyr_1.8.1           sendmailR_1.1-2
## [25] splines_3.1.0        stats4_3.1.0
## [27] stringr_0.6.2        survival_2.37-7
## [29] tcltk_3.1.0          tools_3.1.0
## [31] xtable_1.7-1         zlibbioc_1.10.0
```

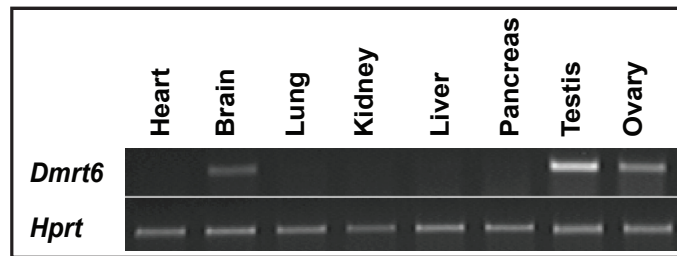

**Figure S1 Expression of *Dmrt1* mRNA in adult tissues.**

RT-PCR of mRNA from eight tissues detects abundant *Dmrt6* expression in testis and low *Dmrt6* expression in brain and ovary. *Hprt* was used as a positive control.

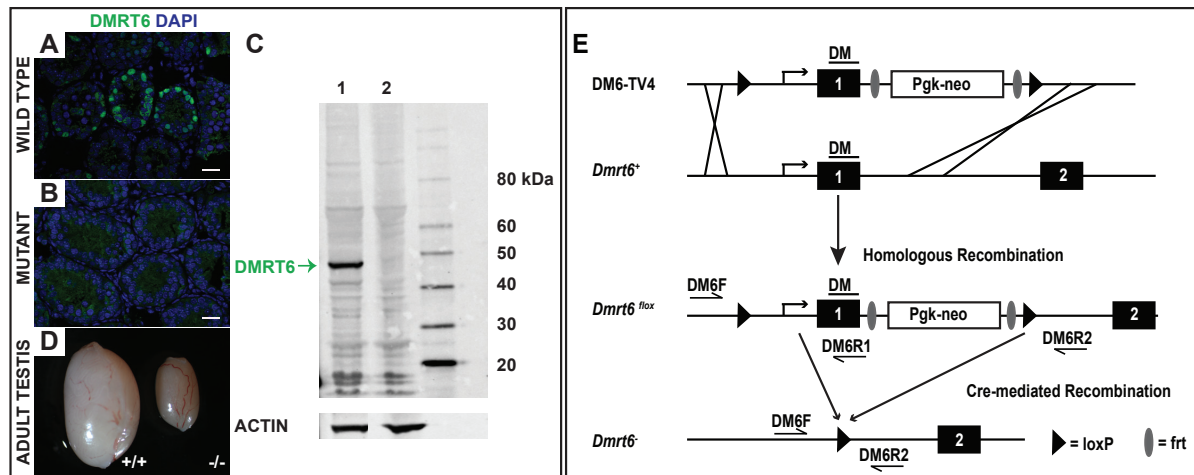

**Figure S2 Generation of *Dmrt6* floxed and null alleles.**

(A, B) IF staining juvenile (P10) testes with affinity purified DMRT6 polyclonal antibody (see Materials and Methods) showing that *Dmrt6* mutant testes lack detectable DMRT6 protein. Scale bar: 10  $\mu$ m (C) Western Blot of P14 wild type (lane 1) and *Dmrt6* mutant testes (lane 2). Protein expression is normalized to beta-ACTIN. (D) Seven-week-old wild type and *Dmrt6* mutant testes, showing reduced size of mutant testis. (E) Diagram of gene targeting strategy. Homologous recombination in embryonic stem cells (ES cells) generated the *Dmrt6*<sup>lox</sup> allele in which exon 1 of *Dmrt6*, which contains the DM DNA binding domain, flanked by loxP sites. *Dmrt6*<sup>lox</sup> also contains a neomycin resistance cassette (*Pgk-neo*) flanked by recognition sites for the F1p recombinase (*frt* sites), allowing its excision. Cre-mediated recombination excised exon 1 and the proximal promoter as well as part of intron 1, generating the putative null allele *Dmrt6*. We confirmed homologous recombination of both targeting vector arms by Southern blotting (not shown) and also confirmed that mice made from two independently targeted ES cell clones had identical phenotypes. Genotyping primers are indicated.

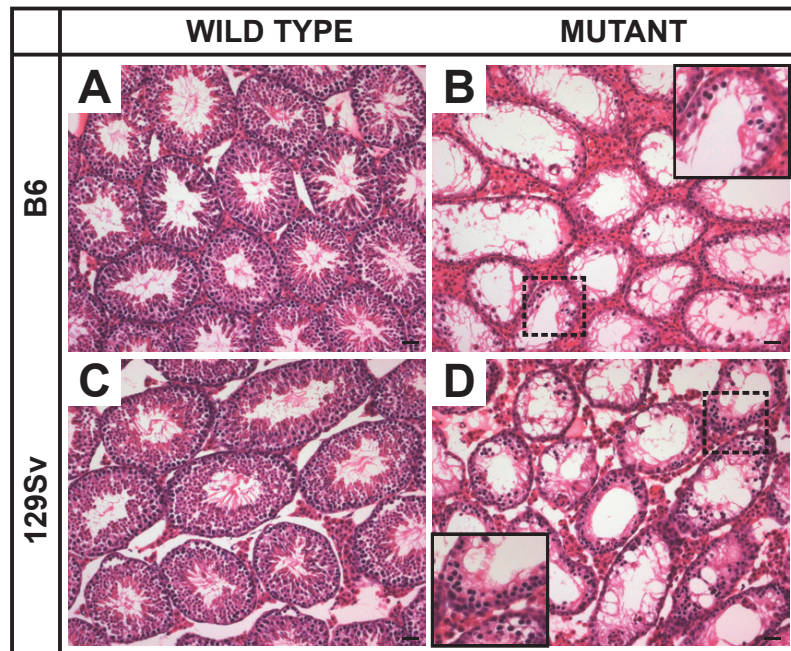

**Figure S3 Histology comparison of B6 and 129Sv *Dmrt6* mutant testes.** Hematoxylin/eosin (H&E) staining of seven-week-old wild type (A,C) and *Dmrt6* mutant testes (B,D) on B6 (A,B) or 129Sv (C,D) genetic backgrounds. Insets are higher magnification showing the greater number of meiotic cells in *Dmrt6* mutant testes on the 129Sv background. Scale bars: 20  $\mu$ m

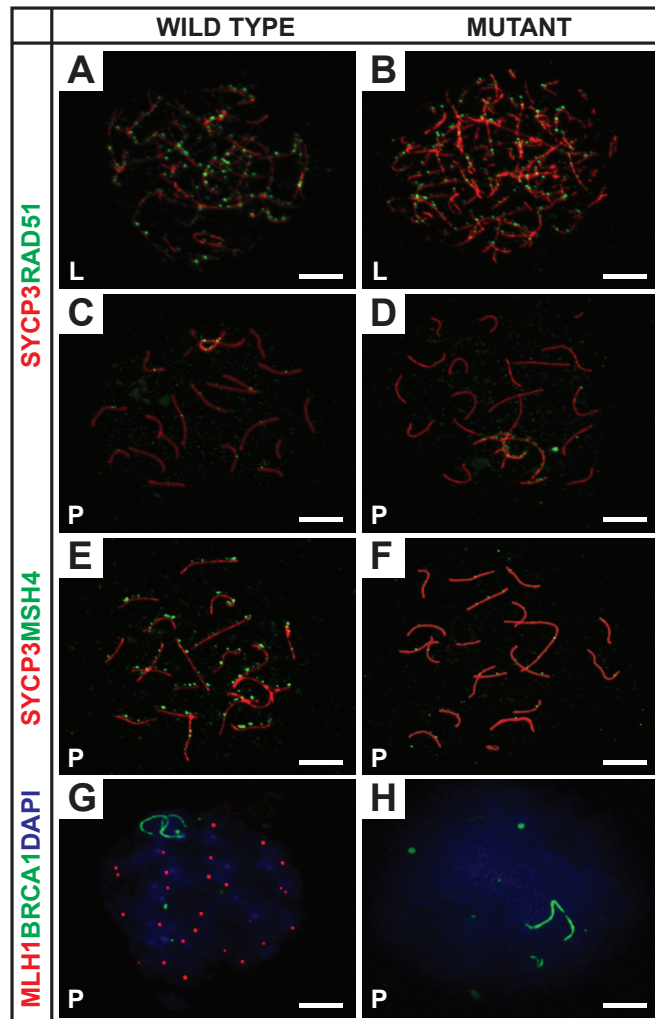

**Figure S4 *Dmrt6* mutant spermatocytes can form double strand breaks but do not undergo meiotic recombination.**

IF of chromosome spreads from wild type or *Dmrt6* adult leptotene (L) and pachytene (P) spermatocytes. (A-D) Wild type and *Dmrt6* leptotene spermatocytes accumulate foci of RAD51, indicating that double strand DNA breaks form and are repaired normally in *Dmrt6* mutants. (E-H) Wild type but not mutant pachytene spermatocytes accumulate MSH4 positive transitional nodules and MLH1 positive recombination nodules, which are sites of crossing over. BRCA1 marks unpaired sex chromosomes in pachytene spermatocytes. Note that mutant cells with extensive homolog pairing were selected for this figure in order to increase the chance of detecting recombination nodules. Typical mutant cells are shown in Figure 4. Scale bar 10  $\mu$ m.

**Table S1:** Genes misexpressed in *Dmrt6* mutant testes.

[Download Table S1](#)

**Table S2:** Genes misexpressed in *Dmrt6* mutant testes selected for spermatogonial expression and function in meiosis or testis development.

[Download Table S2](#)

**Table S3:** DMRT6-associated chromatin regions from ChIP-seq.

[Download Table S3](#)

**Table S4:** Antibodies used in this study.

| Primary Antibody |                        | Dilution | Source              | Reference                         |
|------------------|------------------------|----------|---------------------|-----------------------------------|
| <b>BC7</b>       | Rat monoclonal         | 1:100    | Hiromitsu Tanaka    | Koshimizu et al.<br>PMID: 7766415 |
| <b>BRCA1</b>     | Rabbit polyclonal      | 1:200    | Satoshi Namekawa    | Ichijima et al.<br>PMID: 3084029  |
| <b>Brdu</b>      | Rat monoclonal (IgG)   | 1:200    | Abcam               | Cat. No. ab6326                   |
| <b>DMRT1</b>     | Goat polyclonal        | 1:50     | Santa Cruz          | Cat. No. sc-104885                |
| <b>DMRT6</b>     | Rabbit polyclonal      | 1:200    | David Zarkower      | This paper                        |
| <b>MLH1</b>      | Rabbit polyclonal      | 1:100    | Santa Cruz          | Cat. No. sc-581                   |
| <b>MSH4</b>      | Rabbit polyclonal      | 1:50     | Abcam               | Cat. No. ab58666                  |
| <b>PLZF</b>      | Mouse monoclonal (IgG) | 1:200    | Calbiochem          | Cat. No. OP128                    |
| <b>RAD51</b>     | Rabbit polyclonal      | 1:200    | Calbiochem          | Cat. No. PC130                    |
| <b>SOHLH1</b>    | Guinea pig polyclonal  | 1:100    | Aleksandar Rajkovic | Pangas et al.<br>PMID: 1472434    |
| <b>SOHLH2</b>    | Guinea pig polyclonal  | 1:200    | Aleksandar Rajkovic | Ballow et al.<br>PMID: 16564520   |
| <b>STRA8</b>     | Rabbit polyclonal      | 1:200    | Abcam               | Cat. No. ab15092                  |
| <b>SOX9</b>      | Rabbit polyclonal      | 1:200    | Millipore           | Cat. No. AB5535                   |
| <b>SUMO-1</b>    | Mouse monoclonal (IgG) | 1:200    | Zymed Laboratories  | Cat. No. 33-2400                  |
| <b>SYCP1</b>     | Rabbit polyclonal      | 1:200    | Abcam               | Cat. No. ab15090                  |
| <b>SYCP3</b>     | Mouse polyclonal       | 1:200    | Abcam               | Cat. No. ab96672                  |
| <b>TRA98</b>     | Rat monoclonal (IgG)   | 1:200    | Bio Academia        | Cat. No. 73-003<br>PMID: 9568529  |

| Secondary Antibody                     |                   | Dilution | Source     | Reference       |
|----------------------------------------|-------------------|----------|------------|-----------------|
| <b>Anti Goat IgG Alexa Fluor 594</b>   | Donkey polyclonal | 1:500    | Invitrogen | Cat. No. A11058 |
| <b>Anti Guinea pig Alexa Fluor 488</b> | Goat polyclonal   | 1:500    | Invitrogen | Cat. No. A11073 |
| <b>Anti Mouse IgG Alexa Fluor 568</b>  | Goat polyclonal   | 1:500    | Invitrogen | Cat. No. A11004 |
| <b>Anti Rabbit Alexa Fluor 488</b>     | Goat polyclonal   | 1:500    | Invitrogen | Cat. No. A11008 |
| <b>Anti Rabbit Alexa Fluor 488</b>     | Donkey polyclonal | 1:500    | Invitrogen | Cat. No. A21206 |
| <b>Anti Rat Alexa Fluor 594</b>        | Goat polyclonal   | 1:500    | Invitrogen | Cat. No. A11007 |
